# Supplementary material for: In Vitro Effects of Pesticides on European Foulbrood in Honeybee Larvae
Source: MDPI journal article supplement (doi:10.3390/insects11040252), 2020-04-17
Supplement: s1 [file s1]

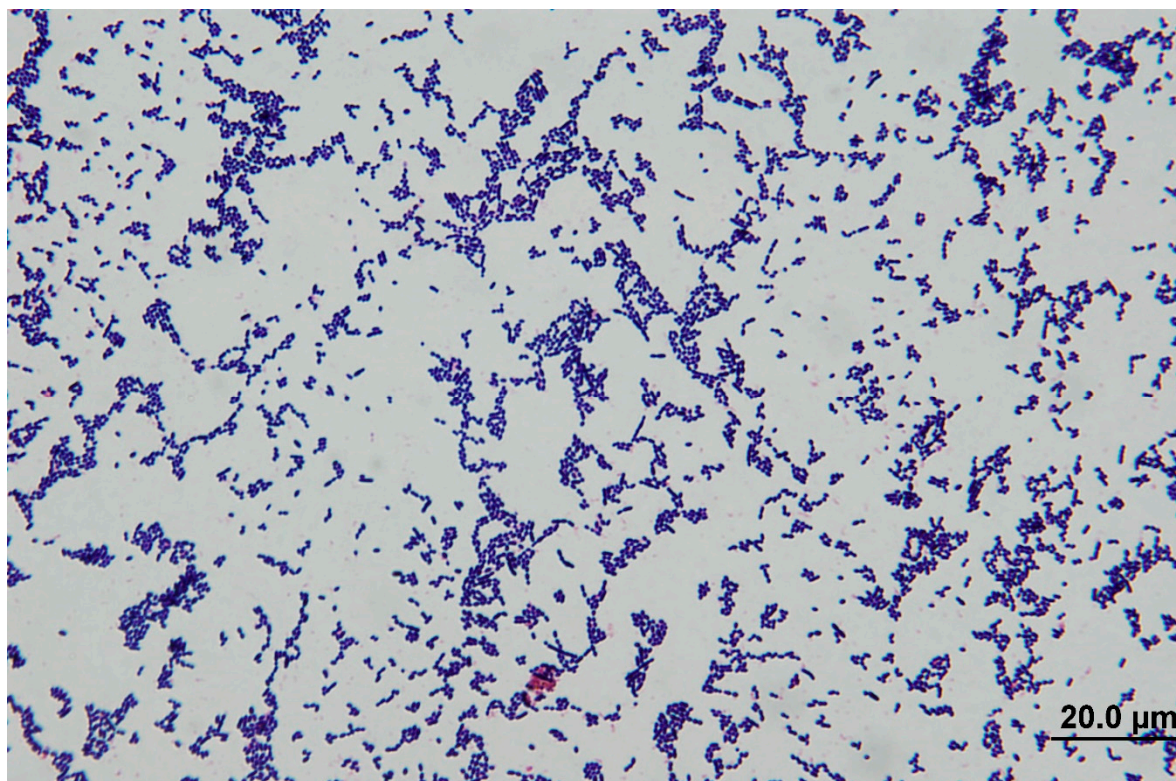

**Figure S1.** Gram stain of *Melissococcus plutonius* isolate from a honey bee colony pollinating blueberries in the Fraser Valley of British Columbia. The bacteria forms characteristic short chains of gram-positive lanceolate cocci.

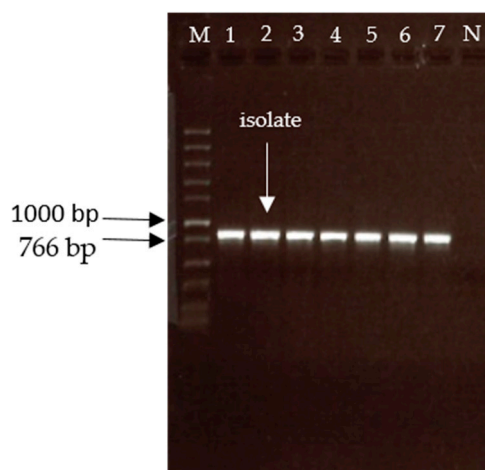

**Figure S2.** Agarose gel (1%) of PCR product from genomic DNA of *Melissococcus plutonius* isolates. The white arrow indicates an 812 base pair band which confirms the *M. plutonius* identity of the bacterial isolate utilized in the present study. Lanes 1, 3, and 4-7 represent other *M. plutonius* isolates; N, no template control; M, molecular size marker (Fast DNA Ladder, New England BioLabs, Whitby, ON, Canada).

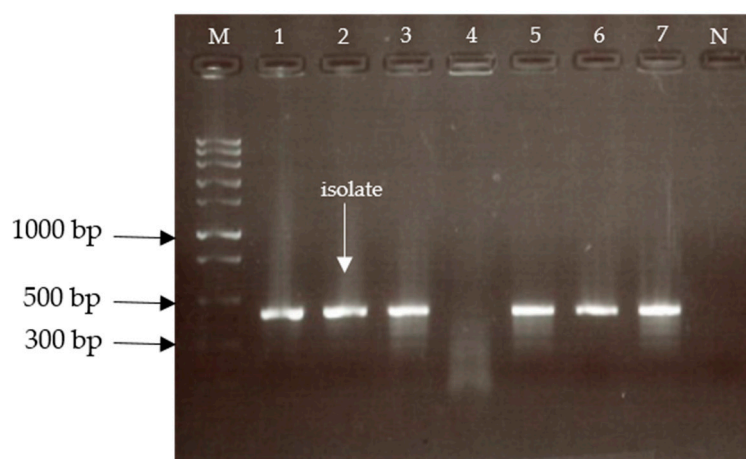

**Figure S3.** Agarose gel (1%) of duplex PCR product from genomic DNA of *Melissococcus plutonius* isolates. The white arrow in lane 2 indicates a 424 base pair band which identifies the bacterial isolate used in the present study as an atypical strain of *M. plutonius*. Lanes 1, 3, and 5-7 represent other atypical *M. plutonius* isolates; lane 4 is a PCR reaction failure; N, no template control; M, molecular size marker (Fast DNA Ladder, New England BioLabs, Whitby, ON, Canada).

**Table S1.** Cox proportional hazards regression survival analysis of 46-84 *Apis mellifera* larvae infected with 50 colony forming units (CFU) of *Melissococcus plutonius* and chronically exposed dietary thiamethoxam and/or fungicides from day 0 to day 5 *in vitro*. Mortality was recorded daily for 6 days.

| Treatment<br>(ng/μl) | Hazard<br>ratio <sup>1</sup> | Standard error | P     | 95% Confidence Interval |       |
|----------------------|------------------------------|----------------|-------|-------------------------|-------|
|                      |                              |                |       | lower                   | upper |
| THI 1                | 1.52                         | 0.46           | 0.17  | 0.84                    | 2.74  |
| THI 10               | 1.35                         | 0.38           | 0.29  | 0.78                    | 2.33  |
| BOS 29               | 1.16                         | 0.25           | 0.48  | 0.77                    | 1.76  |
| THI 1 BOS 29         | 0.97                         | 0.19           | 0.88  | 0.66                    | 1.44  |
| PYR 14               | 0.91                         | 0.26           | 0.75  | 0.53                    | 1.59  |
| THI 1 PYR 14         | 0.76                         | 0.21           | 0.33  | 0.44                    | 1.32  |
| PROP 14              | 1.57                         | 0.51           | 0.17  | 0.83                    | 2.98  |
| THI 1 PROP 14        | 1.85                         | 0.58           | 0.048 | 1.00                    | 3.42  |

<sup>1</sup>The hazard ratio indicates the effect of a unit change in pesticide treatment on frequency of death relative to the control group which was infected with 50 CFU *M. plutonius* and received uncontaminated diet from day 0 to day 5. THI, thiamethoxam; BOS, boscalid; PYR, pyrimethanil; PROP, propiconazole.
