# Supplementary material for: In Vitro Effects of Pesticides on European Foulbrood in Honeybee Larvae
Source: Insects. 2020 Apr 17;11(4):252. doi: 10.3390/insects11040252 (PMC7240397; doi:10.3390/insects11040252)
Supplement: Supplementary file 1 [file insects-11-00252-s001.zip › raw_data.xlsx]

## Sheet: THI
id	plate	tx	bacteria	censor	survive
1	37	control	0	0	6
2	37	control	0	0	6
3	37	control	0	0	6
4	37	control	0	0	6
5	37	control	0	0	6
6	37	control	0	0	6
7	37	control	0	0	6
8	37	control	0	0	6
9	37	control	0	0	6
10	37	control	0	0	6
11	37	control	0	0	6
12	37	control	0	0	6
13	37	thi10	0	1	3
14	37	thi10	0	0	6
15	37	thi10	0	0	6
16	37	thi10	0	0	6
17	37	thi10	0	0	6
18	37	thi10	0	0	6
19	37	thi10	0	0	6
20	37	thi10	0	0	6
21	37	thi10	0	0	6
22	37	thi10	0	0	6
23	37	thi10	0	0	6
24	37	thi10	0	0	6
25	37	thi10	0.001	1	5
26	37	thi10	0.001	1	5
27	37	thi10	0.001	1	6
28	37	thi10	0.001	0	6
29	37	thi10	0.001	0	6
30	37	thi10	0.001	0	6
31	37	thi10	0.001	0	6
32	37	thi10	0.001	0	6
33	37	thi10	0.001	0	6
34	37	thi10	0.001	0	6
35	37	thi10	0.001	0	6
36	37	thi10	0.01	1	3
37	37	thi10	0.01	1	4
38	37	thi10	0.01	1	4
39	37	thi10	0.01	1	4
40	37	thi10	0.01	1	4
41	37	thi10	0.01	1	4
42	37	thi10	0.01	1	5
43	37	thi10	0.01	1	5
44	37	thi10	0.01	1	5
45	37	thi10	0.01	1	6
46	37	thi10	0.01	1	6
47	37	thi10	0.01	1	6
48	38	control	0	0	6
49	38	control	0	0	6
50	38	control	0	0	6
51	38	control	0	0	6
52	38	control	0	0	6
53	38	control	0	0	6
54	38	control	0	0	6
55	38	control	0	0	6
56	38	control	0	0	6
57	38	control	0	0	6
58	38	control	0	0	6
59	38	control	0	0	6
60	38	thi10	0	1	1
61	38	thi10	0	0	6
62	38	thi10	0	0	6
63	38	thi10	0	0	6
64	38	thi10	0	0	6
65	38	thi10	0	0	6
66	38	thi10	0	0	6
67	38	thi10	0	0	6
68	38	thi10	0	0	6
69	38	thi10	0	0	6
70	38	thi10	0	0	6
71	38	thi10	0	0	6
72	38	thi10	0.001	1	5
73	38	thi10	0.001	1	5
74	38	thi10	0.001	1	5
75	38	thi10	0.001	1	5
76	38	thi10	0.001	1	5
77	38	thi10	0.001	0	6
78	38	thi10	0.001	0	6
79	38	thi10	0.001	0	6
80	38	thi10	0.001	0	6
81	38	thi10	0.001	0	6
82	38	thi10	0.001	0	6
83	38	thi10	0.001	0	6
84	38	thi10	0.01	1	3
85	38	thi10	0.01	1	3
86	38	thi10	0.01	1	4
87	38	thi10	0.01	1	4
88	38	thi10	0.01	1	5
89	38	thi10	0.01	1	5
90	38	thi10	0.01	1	5
91	38	thi10	0.01	1	6
92	38	thi10	0.01	1	6
93	38	thi10	0.01	1	6
94	38	thi10	0.01	1	6
95	38	thi10	0.01	1	6
96	39	control	0	0	6
97	39	control	0	0	6
98	39	control	0	0	6
99	39	control	0	0	6
100	39	control	0	0	6
101	39	control	0	0	6
102	39	control	0	0	6
103	39	control	0	0	6
104	39	control	0	0	6
105	39	control	0	0	6
106	39	control	0	0	6
107	39	control	0	0	6
108	39	control	0.001	1	5
109	39	control	0.001	1	5
110	39	control	0.001	1	6
111	39	control	0.001	0	6
112	39	control	0.001	0	6
113	39	control	0.001	0	6
114	39	control	0.001	0	6
115	39	control	0.001	0	6
116	39	control	0.001	0	6
117	39	control	0.001	0	6
118	39	control	0.001	0	6
119	39	control	0.001	0	6
120	39	control	0.01	1	4
121	39	control	0.01	1	5
122	39	control	0.01	1	5
123	39	control	0.01	1	5
124	39	control	0.01	1	6
125	39	control	0.01	1	6
126	39	control	0.01	1	6
127	39	control	0.01	1	6
128	39	control	0.01	1	6
129	39	control	0.01	1	6
130	39	control	0.01	1	6
131	39	control	0.01	1	6
132	40	control	0	0	6
133	40	control	0	0	6
134	40	control	0	0	6
135	40	control	0	0	6
136	40	control	0	0	6
137	40	control	0	0	6
138	40	control	0	0	6
139	40	control	0	0	6
140	40	control	0	0	6
141	40	control	0	0	6
142	40	control	0	0	6
143	40	control	0	0	6
144	40	thi10	0	1	2
145	40	thi10	0	1	2
146	40	thi10	0	1	2
147	40	thi10	0	0	6
148	40	thi10	0	0	6
149	40	thi10	0	0	6
150	40	thi10	0	0	6
151	40	thi10	0	0	6
152	40	thi10	0	0	6
153	40	thi10	0	0	6
154	40	thi10	0	0	6
155	40	thi10	0	0	6
156	40	thi10	0.001	1	5
157	40	thi10	0.001	1	5
158	40	thi10	0.001	1	6
159	40	thi10	0.001	1	6
160	40	thi10	0.001	0	6
161	40	thi10	0.001	0	6
162	40	thi10	0.001	0	6
163	40	thi10	0.001	0	6
164	40	thi10	0.001	0	6
165	40	thi10	0.001	0	6
166	40	thi10	0.001	0	6
167	40	thi10	0.001	0	6
168	40	thi10	0.01	1	2
169	40	thi10	0.01	1	4
170	40	thi10	0.01	1	5
171	40	thi10	0.01	1	5
172	40	thi10	0.01	1	5
173	40	thi10	0.01	1	5
174	40	thi10	0.01	1	5
175	40	thi10	0.01	1	6
176	40	thi10	0.01	1	6
177	40	thi10	0.01	1	6
178	40	thi10	0.01	1	6
179	40	thi10	0.01	0	6
180	41	control	0	1	3
181	41	control	0	0	6
182	41	control	0	0	6
183	41	control	0	0	6
184	41	control	0	0	6
185	41	control	0	0	6
186	41	control	0	0	6
187	41	control	0	0	6
188	41	control	0	0	6
189	41	control	0	0	6
190	41	control	0	0	6
191	41	control	0	0	6
192	41	thi10	0	1	6
193	41	thi10	0	0	6
194	41	thi10	0	0	6
195	41	thi10	0	0	6
196	41	thi10	0	0	6
197	41	thi10	0	0	6
198	41	thi10	0	0	6
199	41	thi10	0	0	6
200	41	thi10	0	0	6
201	41	thi10	0	0	6
202	41	thi10	0	0	6
203	41	thi10	0.001	1	2
204	41	thi10	0.001	1	4
205	41	thi10	0.001	1	4
206	41	thi10	0.001	1	5
207	41	thi10	0.001	1	5
208	41	thi10	0.001	1	6
209	41	thi10	0.001	1	6
210	41	thi10	0.001	1	6
211	41	thi10	0.001	0	6
212	41	thi10	0.001	0	6
213	41	thi10	0.001	0	6
214	41	thi10	0.001	0	6
215	41	thi10	0.01	1	4
216	41	thi10	0.01	1	4
217	41	thi10	0.01	1	5
218	41	thi10	0.01	1	5
219	41	thi10	0.01	1	5
220	41	thi10	0.01	1	5
221	41	thi10	0.01	1	6
222	41	thi10	0.01	1	6
223	41	thi10	0.01	1	6
224	41	thi10	0.01	1	6
225	41	thi10	0.01	1	6
226	41	thi10	0.01	1	6
227	42	control	0	1	2
228	42	control	0	1	2
229	42	control	0	0	6
230	42	control	0	0	6
231	42	control	0	0	6
232	42	control	0	0	6
233	42	control	0	0	6
234	42	control	0	0	6
235	42	control	0	0	6
236	42	control	0	0	6
237	42	control	0	0	6
238	42	control	0	0	6
239	42	control	0.001	1	4
240	42	control	0.001	1	5
241	42	control	0.001	1	6
242	42	control	0.001	1	6
243	42	control	0.001	1	6
244	42	control	0.001	1	6
245	42	control	0.001	1	6
246	42	control	0.001	0	6
247	42	control	0.001	0	6
248	42	control	0.001	0	6
249	42	control	0.001	0	6
250	42	control	0.001	0	6
251	42	control	0.01	1	4
252	42	control	0.01	1	4
253	42	control	0.01	1	4
254	42	control	0.01	1	5
255	42	control	0.01	1	5
256	42	control	0.01	1	5
257	42	control	0.01	1	5
258	42	control	0.01	1	5
259	42	control	0.01	1	6
260	42	control	0.01	1	6
261	42	control	0.01	1	6
262	42	control	0.01	1	6
263	43	control	0	0	6
264	43	control	0	0	6
265	43	control	0	0	6
266	43	control	0	0	6
267	43	control	0	0	6
268	43	control	0	0	6
269	43	control	0	0	6
270	43	control	0	0	6
271	43	control	0	0	6
272	43	control	0	0	6
273	43	control	0	0	6
274	43	control	0	0	6
275	43	thi1	0	1	5
276	43	thi1	0	0	6
277	43	thi1	0	0	6
278	43	thi1	0	0	6
279	43	thi1	0	0	6
280	43	thi1	0	0	6
281	43	thi1	0	0	6
282	43	thi1	0	0	6
283	43	thi1	0	0	6
284	43	thi1	0	0	6
285	43	thi1	0	0	6
286	43	thi1	0	0	6
287	43	thi1	0.001	1	5
288	43	thi1	0.001	1	5
289	43	thi1	0.001	1	5
290	43	thi1	0.001	1	5
291	43	thi1	0.001	1	5
292	43	thi1	0.001	1	6
293	43	thi1	0.001	1	6
294	43	thi1	0.001	0	6
295	43	thi1	0.001	0	6
296	43	thi1	0.001	0	6
297	43	thi1	0.001	0	6
298	43	thi1	0.01	1	1
299	43	thi1	0.01	1	4
300	43	thi1	0.01	1	4
301	43	thi1	0.01	1	4
302	43	thi1	0.01	1	5
303	43	thi1	0.01	1	5
304	43	thi1	0.01	1	5
305	43	thi1	0.01	1	5
306	43	thi1	0.01	1	5
307	43	thi1	0.01	1	5
308	43	thi1	0.01	1	5
309	43	thi1	0.01	1	5
310	44	control	0	0	6
311	44	control	0	0	6
312	44	control	0	0	6
313	44	control	0	0	6
314	44	control	0	0	6
315	44	control	0	0	6
316	44	control	0	0	6
317	44	control	0	0	6
318	44	control	0	0	6
319	44	control	0	0	6
320	44	control	0	0	6
321	44	control	0	0	6
322	44	thi1	0	0	6
323	44	thi1	0	0	6
324	44	thi1	0	0	6
325	44	thi1	0	0	6
326	44	thi1	0	0	6
327	44	thi1	0	0	6
328	44	thi1	0	0	6
329	44	thi1	0	0	6
330	44	thi1	0	0	6
331	44	thi1	0	0	6
332	44	thi1	0	0	6
333	44	thi1	0	0	6
334	44	thi1	0.001	1	4
335	44	thi1	0.001	1	4
336	44	thi1	0.001	1	5
337	44	thi1	0.001	1	5
338	44	thi1	0.001	1	5
339	44	thi1	0.001	1	5
340	44	thi1	0.001	1	6
341	44	thi1	0.001	0	6
342	44	thi1	0.001	0	6
343	44	thi1	0.001	0	6
344	44	thi1	0.001	0	6
345	44	thi1	0.001	0	6
346	44	thi1	0.01	1	4
347	44	thi1	0.01	1	4
348	44	thi1	0.01	1	4
349	44	thi1	0.01	1	5
350	44	thi1	0.01	1	5
351	44	thi1	0.01	1	5
352	44	thi1	0.01	1	5
353	44	thi1	0.01	1	5
354	44	thi1	0.01	1	5
355	45	control	0	0	6
356	45	control	0	0	6
357	45	control	0	0	6
358	45	control	0	0	6
359	45	control	0	0	6
360	45	control	0	0	6
361	45	control	0	0	6
362	45	control	0	0	6
363	45	control	0	0	6
364	45	control	0	0	6
365	45	control	0	0	6
366	45	control	0	0	6
367	45	control	0.001	1	4
368	45	control	0.001	1	5
369	45	control	0.001	1	5
370	45	control	0.001	1	5
371	45	control	0.001	1	5
372	45	control	0.001	0	6
373	45	control	0.001	0	6
374	45	control	0.001	0	6
375	45	control	0.001	0	6
376	45	control	0.001	0	6
377	45	control	0.001	0	6
378	45	control	0.001	0	6
379	45	control	0.01	1	4
380	45	control	0.01	1	5
381	45	control	0.01	1	5
382	45	control	0.01	1	5
383	45	control	0.01	1	5
384	45	control	0.01	1	5
385	45	control	0.01	1	5
386	45	control	0.01	1	5
387	45	control	0.01	1	5
388	45	control	0.01	1	5
389	45	control	0.01	1	5
390	45	control	0.01	1	5
391	46	control	0	1	3
392	46	control	0	1	6
393	46	control	0	0	6
394	46	control	0	0	6
395	46	control	0	0	6
396	46	control	0	0	6
397	46	control	0	0	6
398	46	control	0	0	6
399	46	control	0	0	6
400	46	control	0	0	6
401	46	control	0	0	6
402	46	control	0	0	6
403	46	thi1	0	1	1
404	46	thi1	0	1	3
405	46	thi1	0	1	4
406	46	thi1	0	0	6
407	46	thi1	0	0	6
408	46	thi1	0	0	6
409	46	thi1	0	0	6
410	46	thi1	0	0	6
411	46	thi1	0	0	6
412	46	thi1	0	0	6
413	46	thi1	0	0	6
414	46	thi1	0	0	6
415	46	thi1	0.001	1	4
416	46	thi1	0.001	1	5
417	46	thi1	0.001	1	6
418	46	thi1	0.001	1	6
419	46	thi1	0.001	0	6
420	46	thi1	0.001	0	6
421	46	thi1	0.001	0	6
422	46	thi1	0.001	0	6
423	46	thi1	0.001	0	6
424	46	thi1	0.001	0	6
425	46	thi1	0.001	0	6
426	46	thi1	0.001	0	6
427	46	thi1	0.01	1	3
428	46	thi1	0.01	1	3
429	46	thi1	0.01	1	4
430	46	thi1	0.01	1	4
431	46	thi1	0.01	1	4
432	46	thi1	0.01	1	5
433	46	thi1	0.01	1	5
434	46	thi1	0.01	1	5
435	46	thi1	0.01	1	6
436	46	thi1	0.01	1	6
437	46	thi1	0.01	1	6
438	46	thi1	0.01	0	6
439	47	control	0	1	6
440	47	control	0	0	6
441	47	control	0	0	6
442	47	control	0	0	6
443	47	control	0	0	6
444	47	control	0	0	6
445	47	control	0	0	6
446	47	control	0	0	6
447	47	control	0	0	6
448	47	control	0	0	6
449	47	control	0	0	6
450	47	thi1	0	1	2
451	47	thi1	0	0	6
452	47	thi1	0	0	6
453	47	thi1	0	0	6
454	47	thi1	0	0	6
455	47	thi1	0	0	6
456	47	thi1	0	0	6
457	47	thi1	0	0	6
458	47	thi1	0	0	6
459	47	thi1	0	0	6
460	47	thi1	0	0	6
461	47	thi1	0	0	6
462	47	thi1	0.001	1	4
463	47	thi1	0.001	1	4
464	47	thi1	0.001	1	5
465	47	thi1	0.001	1	6
466	47	thi1	0.001	1	6
467	47	thi1	0.001	0	6
468	47	thi1	0.001	0	6
469	47	thi1	0.001	0	6
470	47	thi1	0.001	0	6
471	47	thi1	0.001	0	6
472	47	thi1	0.001	0	6
473	47	thi1	0.001	0	6
474	47	thi1	0.01	1	3
475	47	thi1	0.01	1	3
476	47	thi1	0.01	1	3
477	47	thi1	0.01	1	3
478	47	thi1	0.01	1	4
479	47	thi1	0.01	1	4
480	47	thi1	0.01	1	4
481	47	thi1	0.01	1	4
482	47	thi1	0.01	1	5
483	47	thi1	0.01	1	6
484	47	thi1	0.01	1	6
485	47	thi1	0.01	0	6
486	48	control	0	1	1
487	48	control	0	1	5
488	48	control	0	0	6
489	48	control	0	0	6
490	48	control	0	0	6
491	48	control	0	0	6
492	48	control	0	0	6
493	48	control	0	0	6
494	48	control	0	0	6
495	48	control	0	0	6
496	48	control	0	0	6
497	48	control	0	0	6
498	48	control	0.001	1	3
499	48	control	0.001	1	5
500	48	control	0.001	1	5
501	48	control	0.001	0	6
502	48	control	0.001	0	6
503	48	control	0.001	0	6
504	48	control	0.001	0	6
505	48	control	0.001	0	6
506	48	control	0.001	0	6
507	48	control	0.001	0	6
508	48	control	0.001	0	6
509	48	control	0.001	0	6
510	48	control	0.01	1	3
511	48	control	0.01	1	3
512	48	control	0.01	1	3
513	48	control	0.01	1	4
514	48	control	0.01	1	4
515	48	control	0.01	1	4
516	48	control	0.01	1	4
517	48	control	0.01	1	5
518	48	control	0.01	1	5
519	48	control	0.01	1	5
520	48	control	0.01	1	5
521	48	control	0.01	1	5
522	49	control	0	0	6
523	49	control	0	0	6
524	49	control	0	0	6
525	49	control	0	0	6
526	49	control	0	0	6
527	49	control	0	0	6
528	49	control	0	0	6
529	49	control	0	0	6
530	49	control	0	0	6
531	49	control	0	0	6
532	49	control	0	0	6
533	49	control	0	0	6
534	49	thi10	0	1	6
535	49	thi10	0	0	6
536	49	thi10	0	0	6
537	49	thi10	0	0	6
538	49	thi10	0	0	6
539	49	thi10	0	0	6
540	49	thi10	0	0	6
541	49	thi10	0	0	6
542	49	thi10	0	0	6
543	49	thi10	0	0	6
544	49	thi10	0	0	6
545	49	thi10	0	0	6
546	49	thi10	0.001	1	4
547	49	thi10	0.001	1	6
548	49	thi10	0.001	1	6
549	49	thi10	0.001	1	6
550	49	thi10	0.001	1	6
551	49	thi10	0.001	0	6
552	49	thi10	0.001	0	6
553	49	thi10	0.001	0	6
554	49	thi10	0.001	0	6
555	49	thi10	0.001	0	6
556	49	thi10	0.01	1	3
557	49	thi10	0.01	1	4
558	49	thi10	0.01	1	4
559	49	thi10	0.01	1	4
560	49	thi10	0.01	1	4
561	49	thi10	0.01	1	4
562	49	thi10	0.01	1	4
563	49	thi10	0.01	1	4
564	49	thi10	0.01	1	4
565	49	thi10	0.01	1	5
566	49	thi10	0.01	1	6
567	49	thi10	0.01	1	6
568	50	control	0	0	6
569	50	control	0	0	6
570	50	control	0	0	6
571	50	control	0	0	6
572	50	control	0	0	6
573	50	control	0	0	6
574	50	control	0	0	6
575	50	control	0	0	6
576	50	control	0	0	6
577	50	control	0	0	6
578	50	control	0	0	6
579	50	control	0	0	6
580	50	thi10	0	0	6
581	50	thi10	0	0	6
582	50	thi10	0	0	6
583	50	thi10	0	0	6
584	50	thi10	0	0	6
585	50	thi10	0	0	6
586	50	thi10	0	0	6
587	50	thi10	0	0	6
588	50	thi10	0	0	6
589	50	thi10	0	0	6
590	50	thi10	0	0	6
591	50	thi10	0	0	6
592	50	thi10	0.001	1	4
593	50	thi10	0.001	1	5
594	50	thi10	0.001	1	6
595	50	thi10	0.001	1	6
596	50	thi10	0.001	1	6
597	50	thi10	0.001	1	6
598	50	thi10	0.001	1	6
599	50	thi10	0.001	0	6
600	50	thi10	0.001	0	6
601	50	thi10	0.001	0	6
602	50	thi10	0.001	0	6
603	50	thi10	0.001	0	6
604	50	control	0.01	1	2
605	50	control	0.01	1	4
606	50	control	0.01	1	4
607	50	control	0.01	1	4
608	50	control	0.01	1	4
609	50	control	0.01	1	4
610	50	control	0.01	1	4
611	50	control	0.01	1	5
612	50	control	0.01	1	6
613	50	control	0.01	1	6
614	50	control	0.01	1	6
615	50	control	0.01	1	6
616	51	control	0	1	1
617	51	control	0	1	4
618	51	control	0	0	6
619	51	control	0	0	6
620	51	control	0	0	6
621	51	control	0	0	6
622	51	control	0	0	6
623	51	control	0	0	6
624	51	control	0	0	6
625	51	control	0	0	6
626	51	control	0	0	6
627	51	control	0	0	6
628	51	control	0.001	1	6
629	51	control	0.001	1	6
630	51	control	0.001	1	6
631	51	control	0.001	0	6
632	51	control	0.001	0	6
633	51	control	0.001	0	6
634	51	control	0.001	0	6
635	51	control	0.001	0	6
636	51	control	0.001	0	6
637	51	control	0.001	0	6
638	51	control	0.001	0	6
639	51	control	0.01	1	3
640	51	control	0.01	1	4
641	51	control	0.01	1	4
642	51	control	0.01	1	4
643	51	control	0.01	1	4
644	51	control	0.01	1	4
645	51	control	0.01	1	4
646	51	control	0.01	1	4
647	51	control	0.01	1	4
648	51	control	0.01	1	4
649	51	control	0.01	1	6
650	51	control	0.01	0	6
651	140	control	0	1	4
652	140	control	0	0	6
653	140	control	0	0	6
654	140	control	0	0	6
655	140	control	0	0	6
656	140	control	0	0	6
657	140	control	0	0	6
658	140	control	0	0	6
659	140	control	0	0	6
660	140	control	0	0	6
661	140	control	0	0	6
662	140	control	0	0	6
663	140	thi1	0.02	1	2
664	140	thi1	0.02	1	6
665	140	thi1	0.02	1	6
666	140	thi1	0.02	1	6
667	140	thi1	0.02	1	6
668	140	thi1	0.02	1	6
669	140	thi1	0.02	1	6
670	140	thi1	0.02	1	6
671	140	thi1	0.02	1	6
672	140	thi1	0.02	1	6
673	140	thi1	0.02	1	6
674	140	thi1	0.02	0	6
675	140	thi1	0.02	1	2
676	140	thi1	0.02	1	2
677	140	thi1	0.02	1	3
678	140	thi1	0.02	1	4
679	140	thi1	0.02	1	4
680	140	thi1	0.02	1	4
681	140	thi1	0.02	1	4
682	140	thi1	0.02	1	4
683	140	thi1	0.02	1	5
684	140	thi1	0.02	1	6
685	140	thi1	0.02	1	6
686	140	control	0.02	1	2
687	140	control	0.02	1	5
688	140	control	0.02	1	5
689	140	control	0.02	1	6
690	140	control	0.02	1	6
691	140	control	0.02	1	6
692	140	control	0.02	1	6
693	140	control	0.02	1	6
694	140	control	0.02	1	6
695	140	control	0.02	0	6
696	140	control	0.02	0	6
697	140	control	0.02	0	6
698	141	control	0	0	6
699	141	control	0	0	6
700	141	control	0	0	6
701	141	control	0	0	6
702	141	control	0	0	6
703	141	control	0	0	6
704	141	control	0	0	6
705	141	control	0	0	6
706	141	control	0	0	6
707	141	control	0	0	6
708	141	control	0	0	6
709	141	control	0	0	6
710	141	thi1	0.02	1	3
711	141	thi1	0.02	1	4
712	141	thi1	0.02	1	4
713	141	thi1	0.02	1	4
714	141	thi1	0.02	1	5
715	141	thi1	0.02	1	5
716	141	thi1	0.02	1	5
717	141	thi1	0.02	1	6
718	141	thi1	0.02	1	6
719	141	thi1	0.02	1	6
720	141	thi1	0.02	0	6
721	141	thi1	0.02	0	6
722	141	thi1	0.02	1	4
723	141	thi1	0.02	1	4
724	141	thi1	0.02	1	4
725	141	thi1	0.02	1	5
726	141	thi1	0.02	1	5
727	141	thi1	0.02	1	5
728	141	thi1	0.02	1	6
729	141	thi1	0.02	1	6
730	141	thi1	0.02	0	6
731	141	thi1	0.02	0	6
732	141	thi1	0.02	0	6
733	141	thi1	0.02	0	6
734	141	control	0.02	1	2
735	141	control	0.02	1	4
736	141	control	0.02	1	5
737	141	control	0.02	1	5
738	141	control	0.02	1	5
739	141	control	0.02	1	5
740	141	control	0.02	1	6
741	141	control	0.02	1	6
742	141	control	0.02	0	6
743	141	control	0.02	0	6
744	141	control	0.02	0	6
745	141	control	0.02	0	6
746	142	control	0	0	6
747	142	control	0	0	6
748	142	control	0	0	6
749	142	control	0	0	6
750	142	control	0	0	6
751	142	control	0	0	6
752	142	control	0	0	6
753	142	control	0	0	6
754	142	control	0	0	6
755	142	control	0	0	6
756	142	control	0	0	6
757	142	control	0	0	6
758	142	thi10	0.02	1	1
759	142	thi10	0.02	1	4
760	142	thi10	0.02	1	4
761	142	thi10	0.02	1	4
762	142	thi10	0.02	1	6
763	142	thi10	0.02	1	6
764	142	thi10	0.02	1	6
765	142	thi10	0.02	1	6
766	142	thi10	0.02	1	6
767	142	thi10	0.02	0	6
768	142	thi10	0.02	0	6
769	142	thi10	0.02	0	6
770	142	thi10	0.02	1	1
771	142	thi10	0.02	1	3
772	142	thi10	0.02	1	4
773	142	thi10	0.02	1	4
774	142	thi10	0.02	1	5
775	142	thi10	0.02	1	6
776	142	thi10	0.02	1	6
777	142	thi10	0.02	1	6
778	142	thi10	0.02	0	6
779	142	thi10	0.02	0	6
780	142	thi10	0.02	0	6
781	142	thi10	0.02	0	6
782	142	thi10	0.02	1	1
783	142	thi10	0.02	1	1
784	142	thi10	0.02	1	4
785	142	thi10	0.02	1	4
786	142	thi10	0.02	1	5
787	142	thi10	0.02	1	6
788	142	thi10	0.02	1	6
789	142	thi10	0.02	1	6
790	142	thi10	0.02	0	6
791	142	thi10	0.02	0	6
792	142	thi10	0.02	0	6
793	142	thi10	0.02	0	6
794	152	control	0	1	3
795	152	control	0	0	6
796	152	control	0	0	6
797	152	control	0	0	6
798	152	control	0	0	6
799	152	control	0	0	6
800	152	control	0	0	6
801	152	control	0	0	6
802	152	control	0	0	6
803	152	control	0	0	6
804	152	control	0	0	6
805	152	control	0	0	6
806	152	thi10	0.02	1	3
807	152	thi10	0.02	1	3
808	152	thi10	0.02	1	4
809	152	thi10	0.02	1	4
810	152	thi10	0.02	1	4
811	152	thi10	0.02	1	4
812	152	thi10	0.02	1	4
813	152	thi10	0.02	1	5
814	152	thi10	0.02	1	5
815	152	thi10	0.02	1	6
816	152	thi10	0.02	1	6
817	152	thi10	0.02	0	6
818	158	control	0	0	6
819	158	control	0	0	6
820	158	control	0	0	6
821	158	control	0	0	6
822	158	control	0	0	6
823	158	control	0	0	6
824	158	control	0	0	6
825	158	control	0	0	6
826	158	control	0	0	6
827	158	control	0	0	6
828	158	control	0	0	6
829	158	control	0	0	6
830	158	thi10	0.02	1	4
831	158	thi10	0.02	1	4
832	158	thi10	0.02	1	4
833	158	thi10	0.02	1	5
834	158	thi10	0.02	1	5
835	158	thi10	0.02	1	5
836	158	thi10	0.02	1	5
837	158	thi10	0.02	1	5
838	158	thi10	0.02	1	5
839	158	thi10	0.02	1	6
840	158	thi10	0.02	1	6
841	158	thi10	0.02	1	6
842	158	control	0.02	1	4
843	158	control	0.02	1	4
844	158	control	0.02	1	5
845	158	control	0.02	1	5
846	158	control	0.02	1	6
847	158	control	0.02	1	6
848	158	control	0.02	1	6
849	158	control	0.02	1	6
850	158	control	0.02	1	6
851	158	control	0.02	1	6
852	158	control	0.02	1	6
853	158	control	0.02	0	6
854	155	control	0.02	1	4
855	155	control	0.02	1	4
856	155	control	0.02	1	5
857	155	control	0.02	1	5
858	155	control	0.02	1	6
859	155	control	0.02	1	6
860	155	control	0.02	1	6
861	155	control	0.02	1	6
862	155	control	0.02	0	6
863	155	control	0.02	0	6
864	155	control	0.02	0	6

## Sheet: PROP
id	plate	tx	bacteria	censor	survive
1	96	control	0	1	6
2	96	control	0	0	6
3	96	control	0	0	6
4	96	control	0	0	6
5	96	control	0	0	6
6	96	control	0	0	6
7	96	control	0	0	6
8	96	control	0	0	6
9	96	control	0	0	6
10	96	control	0	0	6
11	96	control	0	0	6
12	96	control	0	0	6
13	96	control	0.001	1	2
14	96	control	0.001	0	6
15	96	control	0.001	0	6
16	96	control	0.001	0	6
17	96	control	0.001	0	6
18	96	control	0.001	0	6
19	96	control	0.001	0	6
20	96	control	0.001	0	6
21	96	control	0.001	0	6
22	96	control	0.001	0	6
23	96	control	0.001	0	6
24	96	control	0.001	0	6
25	96	control	0.01	1	4
26	96	control	0.01	1	4
27	96	control	0.01	1	5
28	96	control	0.01	1	5
29	96	control	0.01	1	5
30	96	control	0.01	1	5
31	96	control	0.01	1	5
32	96	control	0.01	1	6
33	96	control	0.01	1	6
34	96	control	0.01	1	6
35	96	control	0.01	1	6
36	96	control	0.01	0	6
37	97	control	0	1	4
38	97	control	0	0	6
39	97	control	0	0	6
40	97	control	0	0	6
41	97	control	0	0	6
42	97	control	0	0	6
43	97	control	0	0	6
44	97	control	0	0	6
45	97	control	0	0	6
46	97	control	0	0	6
47	97	control	0	0	6
48	97	control	0	0	6
49	97	prop 14	0.01	1	3
50	97	prop 14	0.01	1	4
51	97	prop 14	0.01	1	4
52	97	prop 14	0.01	1	4
53	97	prop 14	0.01	1	4
54	97	prop 14	0.01	1	4
55	97	prop 14	0.01	1	4
56	97	prop 14	0.01	1	4
57	97	prop 14	0.01	1	5
58	97	prop 14	0.01	1	6
59	97	prop 14	0.01	1	6
60	97	prop 14	0.01	1	6
61	97	prop 14	0.01	1	4
62	97	prop 14	0.01	1	4
63	97	prop 14	0.01	1	4
64	97	prop 14	0.01	1	5
65	97	prop 14	0.01	1	5
66	97	prop 14	0.01	1	5
67	97	prop 14	0.01	1	5
68	97	prop 14	0.01	1	5
69	97	prop 14	0.01	1	6
70	97	prop 14	0.01	1	6
71	97	prop 14	0.01	0	6
72	97	prop 14	0.01	0	6
73	97	control	0.01	1	3
74	97	control	0.01	1	4
75	97	control	0.01	1	4
76	97	control	0.01	1	4
77	97	control	0.01	1	5
78	97	control	0.01	1	5
79	97	control	0.01	1	6
80	97	control	0.01	1	6
81	97	control	0.01	1	6
82	97	control	0.01	1	6
83	97	control	0.01	1	6
84	97	control	0.01	0	6
85	98	control	0	0	6
86	98	control	0	0	6
87	98	control	0	0	6
88	98	control	0	0	6
89	98	control	0	0	6
90	98	control	0	0	6
91	98	control	0	0	6
92	98	control	0	0	6
93	98	control	0	0	6
94	98	control	0	0	6
95	98	control	0	0	6
96	98	control	0	0	6
97	98	thi1prop14	0.01	1	3
98	98	thi1prop14	0.01	1	4
99	98	thi1prop14	0.01	1	4
100	98	thi1prop14	0.01	1	4
101	98	thi1prop14	0.01	1	4
102	98	thi1prop14	0.01	1	5
103	98	thi1prop14	0.01	1	5
104	98	thi1prop14	0.01	1	5
105	98	thi1prop14	0.01	1	6
106	98	thi1prop14	0.01	1	6
107	98	thi1prop14	0.01	1	6
108	98	thi1prop14	0.01	1	6
109	98	thi1prop14	0.01	1	3
110	98	thi1prop14	0.01	1	4
111	98	thi1prop14	0.01	1	5
112	98	thi1prop14	0.01	1	5
113	98	thi1prop14	0.01	1	5
114	98	thi1prop14	0.01	1	5
115	98	thi1prop14	0.01	1	5
116	98	thi1prop14	0.01	1	6
117	98	thi1prop14	0.01	1	6
118	98	thi1prop14	0.01	1	6
119	98	thi1prop14	0.01	1	6
120	98	thi1prop14	0.01	0	6
121	98	control	0.01	1	3
122	98	control	0.01	1	4
123	98	control	0.01	1	4
124	98	control	0.01	1	4
125	98	control	0.01	1	4
126	98	control	0.01	1	4
127	98	control	0.01	1	5
128	98	control	0.01	1	5
129	98	control	0.01	1	5
130	98	control	0.01	0	6
131	98	control	0.01	0	6
132	98	control	0.01	0	6
133	99	control	0	0	6
134	99	control	0	0	6
135	99	control	0	0	6
136	99	control	0	0	6
137	99	control	0	0	6
138	99	control	0	0	6
139	99	control	0	0	6
140	99	control	0	0	6
141	99	control	0	0	6
142	99	control	0	0	6
143	99	control	0	0	6
144	99	control	0	0	6
145	99	prop 14	0	1	4
146	99	prop 14	0	0	6
147	99	prop 14	0	0	6
148	99	prop 14	0	0	6
149	99	prop 14	0	0	6
150	99	prop 14	0	0	6
151	99	prop 14	0	0	6
152	99	prop 14	0	0	6
153	99	prop 14	0	0	6
154	99	prop 14	0	0	6
155	99	prop 14	0	0	6
156	99	prop 14	0	0	6
157	99	thi1prop14	0	0	6
158	99	thi1prop14	0	0	6
159	99	thi1prop14	0	0	6
160	99	thi1prop14	0	0	6
161	99	thi1prop14	0	0	6
162	99	thi1prop14	0	0	6
163	99	thi1prop14	0	0	6
164	99	thi1prop14	0	0	6
165	99	thi1prop14	0	0	6
166	99	thi1prop14	0	0	6
167	99	thi1prop14	0	0	6
168	99	thi1prop14	0	0	6
169	99	thi1prop14	0.01	1	1
170	99	thi1prop14	0.01	1	3
171	99	thi1prop14	0.01	1	4
172	99	thi1prop14	0.01	1	4
173	99	thi1prop14	0.01	1	4
174	99	thi1prop14	0.01	1	4
175	99	thi1prop14	0.01	1	4
176	99	thi1prop14	0.01	1	5
177	99	thi1prop14	0.01	1	5
178	99	thi1prop14	0.01	1	6
179	99	thi1prop14	0.01	1	6
180	99	thi1prop14	0.01	0	6
181	100	control	0	0	6
182	100	control	0	0	6
183	100	control	0	0	6
184	100	control	0	0	6
185	100	control	0	0	6
186	100	control	0	0	6
187	100	control	0	0	6
188	100	control	0	0	6
189	100	control	0	0	6
190	100	control	0	0	6
191	100	control	0	0	6
192	100	control	0	0	6
193	100	control	0.001	1	4
194	100	control	0.001	1	5
195	100	control	0.001	1	5
196	100	control	0.001	0	6
197	100	control	0.001	0	6
198	100	control	0.001	0	6
199	100	control	0.001	0	6
200	100	control	0.001	0	6
201	100	control	0.001	0	6
202	100	control	0.001	0	6
203	100	control	0.001	0	6
204	100	control	0.001	0	6
205	100	control	0.01	1	2
206	100	control	0.01	1	3
207	100	control	0.01	1	4
208	100	control	0.01	1	4
209	100	control	0.01	1	4
210	100	control	0.01	1	4
211	100	control	0.01	1	4
212	100	control	0.01	1	5
213	100	control	0.01	1	5
214	100	control	0.01	1	6
215	100	control	0.01	1	6
216	100	control	0.01	1	6
217	101	control	0	1	2
218	101	control	0	0	6
219	101	control	0	0	6
220	101	control	0	0	6
221	101	control	0	0	6
222	101	control	0	0	6
223	101	control	0	0	6
224	101	control	0	0	6
225	101	control	0	0	6
226	101	control	0	0	6
227	101	control	0	0	6
228	101	control	0	0	6
229	101	prop 14	0.001	1	4
230	101	prop 14	0.001	1	4
231	101	prop 14	0.001	1	5
232	101	prop 14	0.001	1	6
233	101	prop 14	0.001	1	6
234	101	prop 14	0.001	0	6
235	101	prop 14	0.001	0	6
236	101	prop 14	0.001	0	6
237	101	prop 14	0.001	0	6
238	101	prop 14	0.001	0	6
239	101	prop 14	0.001	0	6
240	101	prop 14	0.001	0	6
241	101	prop 14	0.001	1	5
242	101	prop 14	0.001	1	6
243	101	prop 14	0.001	0	6
244	101	prop 14	0.001	0	6
245	101	prop 14	0.001	0	6
246	101	prop 14	0.001	0	6
247	101	prop 14	0.001	0	6
248	101	prop 14	0.001	0	6
249	101	prop 14	0.001	0	6
250	101	prop 14	0.001	0	6
251	101	prop 14	0.001	0	6
252	101	prop 14	0.001	0	6
253	101	control	0.001	1	5
254	101	control	0.001	1	6
255	101	control	0.001	0	6
256	101	control	0.001	0	6
257	101	control	0.001	0	6
258	101	control	0.001	0	6
259	101	control	0.001	0	6
260	101	control	0.001	0	6
261	101	control	0.001	0	6
262	101	control	0.001	0	6
263	101	control	0.001	0	6
264	101	control	0.001	0	6
265	102	control	0	0	6
266	102	control	0	0	6
267	102	control	0	0	6
268	102	control	0	0	6
269	102	control	0	0	6
270	102	control	0	0	6
271	102	control	0	0	6
272	102	control	0	0	6
273	102	control	0	0	6
274	102	control	0	0	6
275	102	control	0	0	6
276	102	control	0	0	6
277	102	thi1prop14	0.001	1	4
278	102	thi1prop14	0.001	1	4
279	102	thi1prop14	0.001	1	5
280	102	thi1prop14	0.001	1	5
281	102	thi1prop14	0.001	1	6
282	102	thi1prop14	0.001	0	6
283	102	thi1prop14	0.001	0	6
284	102	thi1prop14	0.001	0	6
285	102	thi1prop14	0.001	0	6
286	102	thi1prop14	0.001	0	6
287	102	thi1prop14	0.001	0	6
288	102	thi1prop14	0.001	0	6
289	102	thi1prop14	0.001	1	4
290	102	thi1prop14	0.001	1	4
291	102	thi1prop14	0.001	1	5
292	102	thi1prop14	0.001	1	5
293	102	thi1prop14	0.001	0	6
294	102	thi1prop14	0.001	0	6
295	102	thi1prop14	0.001	0	6
296	102	thi1prop14	0.001	0	6
297	102	thi1prop14	0.001	0	6
298	102	thi1prop14	0.001	0	6
299	102	thi1prop14	0.001	0	6
300	102	thi1prop14	0.001	0	6
301	102	control	0.001	1	4
302	102	control	0.001	1	5
303	102	control	0.001	1	5
304	102	control	0.001	1	6
305	102	control	0.001	1	6
306	102	control	0.001	1	6
307	102	control	0.001	1	6
308	102	control	0.001	0	6
309	102	control	0.001	0	6
310	102	control	0.001	0	6
311	102	control	0.001	0	6
312	102	control	0.001	0	6
313	103	control	0	1	2
314	103	control	0	0	6
315	103	control	0	0	6
316	103	control	0	0	6
317	103	control	0	0	6
318	103	control	0	0	6
319	103	control	0	0	6
320	103	control	0	0	6
321	103	control	0	0	6
322	103	control	0	0	6
323	103	control	0	0	6
324	103	control	0	0	6
325	103	prop 14	0.001	1	3
326	103	prop 14	0.001	1	4
327	103	prop 14	0.001	1	4
328	103	prop 14	0.001	1	4
329	103	prop 14	0.001	1	4
330	103	prop 14	0.001	1	5
331	103	prop 14	0.001	1	5
332	103	prop 14	0.001	1	5
333	103	prop 14	0.001	0	6
334	103	prop 14	0.001	0	6
335	103	prop 14	0.001	0	6
336	103	prop 14	0.001	0	6
337	103	thi1prop14	0.001	1	4
338	103	thi1prop14	0.001	1	4
339	103	thi1prop14	0.001	1	5
340	103	thi1prop14	0.001	1	5
341	103	thi1prop14	0.001	1	5
342	103	thi1prop14	0.001	0	6
343	103	thi1prop14	0.001	0	6
344	103	thi1prop14	0.001	0	6
345	103	thi1prop14	0.001	0	6
346	103	thi1prop14	0.001	0	6
347	103	thi1prop14	0.001	0	6
348	103	thi1prop14	0.001	0	6
349	103	control	0.001	1	4
350	103	control	0.001	1	4
351	103	control	0.001	1	5
352	103	control	0.001	0	6
353	103	control	0.001	0	6
354	103	control	0.001	0	6
355	103	control	0.001	0	6
356	103	control	0.001	0	6
357	103	control	0.001	0	6
358	103	control	0.001	0	6
359	103	control	0.001	0	6
360	103	control	0.001	0	6
361	118	control	0	1	6
362	118	control	0	0	6
363	118	control	0	0	6
364	118	control	0	0	6
365	118	control	0	0	6
366	118	control	0	0	6
367	118	control	0	0	6
368	118	control	0	0	6
369	118	control	0	0	6
370	118	control	0	0	6
371	118	control	0	0	6
372	118	control	0	0	6
373	118	prop 14	0.001	1	4
374	118	prop 14	0.001	1	4
375	118	prop 14	0.001	0	6
376	118	prop 14	0.001	0	6
377	118	prop 14	0.001	0	6
378	118	prop 14	0.001	0	6
379	118	prop 14	0.001	0	6
380	118	prop 14	0.001	0	6
381	118	prop 14	0.001	0	6
382	118	prop 14	0.001	0	6
383	118	prop 14	0.001	0	6
384	118	prop 14	0.001	0	6
385	118	prop 14	0.01	1	3
386	118	prop 14	0.01	1	4
387	118	prop 14	0.01	1	4
388	118	prop 14	0.01	1	4
389	118	prop 14	0.01	1	5
390	118	prop 14	0.01	1	6
391	118	prop 14	0.01	1	6
392	118	prop 14	0.01	1	6
393	118	prop 14	0.01	1	6
394	118	prop 14	0.01	1	6
395	118	prop 14	0.01	0	6
396	118	prop 14	0.01	0	6
397	118	control	0.001	1	6
398	118	control	0.001	1	6
399	118	control	0.001	0	6
400	118	control	0.001	0	6
401	118	control	0.001	0	6
402	118	control	0.001	0	6
403	118	control	0.001	0	6
404	118	control	0.001	0	6
405	118	control	0.001	0	6
406	118	control	0.001	0	6
407	118	control	0.001	0	6
408	118	control	0.001	0	6
409	128	control	0	0	6
410	128	control	0	0	6
411	128	control	0	0	6
412	128	control	0	0	6
413	128	control	0	0	6
414	128	control	0	0	6
415	128	control	0	0	6
416	128	control	0	0	6
417	128	control	0	0	6
418	128	control	0	0	6
419	128	control	0	0	6
420	128	control	0	0	6
421	128	thi1prop14	0.02	1	2
422	128	thi1prop14	0.02	1	4
423	128	thi1prop14	0.02	1	5
424	128	thi1prop14	0.02	1	5
425	128	thi1prop14	0.02	1	5
426	128	thi1prop14	0.02	1	6
427	128	thi1prop14	0.02	1	6
428	128	thi1prop14	0.02	1	6
429	128	thi1prop14	0.02	1	6
430	128	thi1prop14	0.02	1	6
431	128	thi1prop14	0.02	0	6
432	128	thi1prop14	0.02	0	6
433	128	thi1prop14	0.02	1	3
434	128	thi1prop14	0.02	1	4
435	128	thi1prop14	0.02	1	4
436	128	thi1prop14	0.02	1	5
437	128	thi1prop14	0.02	1	5
438	128	thi1prop14	0.02	1	5
439	128	thi1prop14	0.02	1	5
440	128	thi1prop14	0.02	1	5
441	128	thi1prop14	0.02	1	6
442	128	thi1prop14	0.02	1	6
443	128	thi1prop14	0.02	0	6
444	128	thi1prop14	0.02	0	6
445	128	thi1prop14	0.02	1	3
446	128	thi1prop14	0.02	1	4
447	128	thi1prop14	0.02	1	5
448	128	thi1prop14	0.02	1	5
449	128	thi1prop14	0.02	1	5
450	128	thi1prop14	0.02	1	5
451	128	thi1prop14	0.02	1	5
452	128	thi1prop14	0.02	1	5
453	128	thi1prop14	0.02	1	6
454	128	thi1prop14	0.02	1	6
455	128	thi1prop14	0.02	0	6
456	128	thi1prop14	0.02	0	6
457	158	thi1prop14	0.01	1	4
458	158	thi1prop14	0.01	1	4
459	158	thi1prop14	0.01	1	4
460	158	thi1prop14	0.01	1	4
461	158	thi1prop14	0.01	1	4
462	158	thi1prop14	0.01	1	5
463	158	thi1prop14	0.01	1	5
464	158	thi1prop14	0.01	1	5
465	158	thi1prop14	0.01	1	6
466	158	thi1prop14	0.01	1	6
467	158	thi1prop14	0.01	1	6
468	158	thi1prop14	0.01	1	6
469	158	control	0	0	6
470	158	control	0	0	6
471	158	control	0	0	6
472	158	control	0	0	6
473	158	control	0	0	6
474	158	control	0	0	6
475	158	control	0	0	6
476	158	control	0	0	6
477	158	control	0	0	6
478	158	control	0	0	6
479	158	control	0	0	6
480	158	control	0	0	6
481	156	control	0	0	6
482	156	control	0	0	6
483	156	control	0	0	6
484	156	control	0	0	6
485	156	control	0	0	6
486	156	control	0	0	6
487	156	control	0	0	6
488	156	control	0	0	6
489	156	control	0	0	6
490	156	control	0	0	6
491	156	control	0	0	6
492	156	control	0	0	6
493	156	thi1prop14	0.001	1	4
494	156	thi1prop14	0.001	1	4
495	156	thi1prop14	0.001	1	5
496	156	thi1prop14	0.001	1	5
497	156	thi1prop14	0.001	1	6
498	156	thi1prop14	0.001	1	6
499	156	thi1prop14	0.001	0	6
500	156	thi1prop14	0.001	0	6
501	156	thi1prop14	0.001	0	6
502	156	thi1prop14	0.001	0	6
503	156	thi1prop14	0.001	0	6
504	156	thi1prop14	0.001	0	6
505	156	thi1prop14	0.02	1	3
506	156	thi1prop14	0.02	1	3
507	156	thi1prop14	0.02	1	3
508	156	thi1prop14	0.02	1	3
509	156	thi1prop14	0.02	1	3
510	156	thi1prop14	0.02	1	3
511	156	thi1prop14	0.02	1	4
512	156	thi1prop14	0.02	1	4
513	156	thi1prop14	0.02	1	6
514	156	thi1prop14	0.02	1	6
515	156	thi1prop14	0.02	0	6
516	156	control	0.001	1	5
517	156	control	0.001	1	5
518	156	control	0.001	1	6
519	156	control	0.001	0	6
520	156	control	0.001	0	6
521	156	control	0.001	0	6
522	156	control	0.001	0	6
523	156	control	0.001	0	6
524	156	control	0.001	0	6
525	156	control	0.001	0	6
526	156	control	0.001	0	6
527	156	control	0.001	0	6
528	153	control	0	1	2
529	153	control	0	0	6
530	153	control	0	0	6
531	153	control	0	0	6
532	153	control	0	0	6
533	153	control	0	0	6
534	153	control	0	0	6
535	153	control	0	0	6
536	153	control	0	0	6
537	153	control	0	0	6
538	153	control	0	0	6
539	153	control	0	0	6
540	153	prop 14	0.01	1	3
541	153	prop 14	0.01	1	3
542	153	prop 14	0.01	1	4
543	153	prop 14	0.01	1	4
544	153	prop 14	0.01	1	4
545	153	prop 14	0.01	1	4
546	153	prop 14	0.01	1	4
547	153	prop 14	0.01	1	4
548	153	prop 14	0.01	1	6
549	153	prop 14	0.01	0	6
550	153	prop 14	0.01	0	6
551	153	prop 14	0.01	0	6
552	153	control	0.01	1	3
553	153	control	0.01	1	3
554	153	control	0.01	1	3
555	153	control	0.01	1	4
556	153	control	0.01	1	4
557	153	control	0.01	1	4
558	153	control	0.01	1	4
559	153	control	0.01	1	4
560	153	control	0.01	1	5
561	153	control	0.01	1	5
562	153	control	0.01	1	5
563	153	control	0.01	1	5
564	154	control	0	0	6
565	154	control	0	0	6
566	154	control	0	0	6
567	154	control	0	0	6
568	154	control	0	0	6
569	154	control	0	0	6
570	154	control	0	0	6
571	154	control	0	0	6
572	154	control	0	0	6
573	154	control	0	0	6
574	154	control	0	0	6
575	154	control	0	0	6
576	154	prop 14	0.02	1	5
577	154	prop 14	0.02	1	5
578	154	prop 14	0.02	1	5
579	154	prop 14	0.02	1	5
580	154	prop 14	0.02	1	5
581	154	prop 14	0.02	1	6
582	154	prop 14	0.02	0	6
583	154	prop 14	0.02	0	6
584	154	prop 14	0.02	0	6
585	154	prop 14	0.02	0	6
586	154	prop 14	0.02	0	6
587	154	prop 14	0.02	0	6
588	154	prop 14	0.02	1	4
589	154	prop 14	0.02	1	5
590	154	prop 14	0.02	1	5
591	154	prop 14	0.02	1	5
592	154	prop 14	0.02	1	5
593	154	prop 14	0.02	1	5
594	154	prop 14	0.02	1	5
595	154	prop 14	0.02	1	6
596	154	prop 14	0.02	1	6
597	154	prop 14	0.02	0	6
598	154	prop 14	0.02	0	6
599	154	prop 14	0.02	0	6
600	154	prop 14	0.02	1	3
601	154	prop 14	0.02	1	4
602	154	prop 14	0.02	1	4
603	154	prop 14	0.02	1	5
604	154	prop 14	0.02	1	5
605	154	prop 14	0.02	1	5
606	154	prop 14	0.02	1	5
607	154	prop 14	0.02	1	6
608	154	prop 14	0.02	1	6
609	154	prop 14	0.02	1	6
610	154	prop 14	0.02	1	6
611	154	prop 14	0.02	0	6
612	155	control	0	0	6
613	155	control	0	0	6
614	155	control	0	0	6
615	155	control	0	0	6
616	155	control	0	0	6
617	155	control	0	0	6
618	155	control	0	0	6
619	155	control	0	0	6
620	155	control	0	0	6
621	155	control	0	0	6
622	155	control	0	0	6
623	155	control	0	0	6
624	155	prop 14	0.02	1	4
625	155	prop 14	0.02	1	4
626	155	prop 14	0.02	1	4
627	155	prop 14	0.02	1	4
628	155	prop 14	0.02	1	5
629	155	prop 14	0.02	1	5
630	155	prop 14	0.02	1	6
631	155	prop 14	0.02	0	6
632	155	prop 14	0.02	0	6
633	155	prop 14	0.02	0	6
634	155	prop 14	0.02	0	6
635	155	prop 14	0.02	0	6
636	155	thi1prop14	0.02	1	3
637	155	thi1prop14	0.02	1	4
638	155	thi1prop14	0.02	1	4
639	155	thi1prop14	0.02	1	4
640	155	thi1prop14	0.02	1	5
641	155	thi1prop14	0.02	1	5
642	155	thi1prop14	0.02	1	6
643	155	thi1prop14	0.02	1	6
644	155	thi1prop14	0.02	0	6
645	155	thi1prop14	0.02	0	6
646	155	thi1prop14	0.02	0	6
647	155	thi1prop14	0.02	0	6
648	155	control	0.02	1	4
649	155	control	0.02	1	4
650	155	control	0.02	1	5
651	155	control	0.02	1	5
652	155	control	0.02	1	6
653	155	control	0.02	1	6
654	155	control	0.02	1	6
655	155	control	0.02	1	6
656	155	control	0.02	0	6
657	155	control	0.02	0	6
658	155	control	0.02	0	6
659	138	control	0	1	1
660	138	control	0	0	6
661	138	control	0	0	6
662	138	control	0	0	6
663	138	control	0	0	6
664	138	control	0	0	6
665	138	control	0	0	6
666	138	control	0	0	6
667	138	control	0	0	6
668	138	control	0	0	6
669	138	control	0	0	6
670	138	control	0	0	6
671	138	control	0.02	1	5
672	138	control	0.02	1	5
673	138	control	0.02	1	5
674	138	control	0.02	1	6
675	138	control	0.02	1	6
676	138	control	0.02	1	6
677	138	control	0.02	1	6
678	138	control	0.02	1	6
679	138	control	0.02	1	6
680	138	control	0.02	0	6
681	138	control	0.02	0	6
682	138	control	0.02	0	6
683	140	control	0	1	4
684	140	control	0	0	6
685	140	control	0	0	6
686	140	control	0	0	6
687	140	control	0	0	6
688	140	control	0	0	6
689	140	control	0	0	6
690	140	control	0	0	6
691	140	control	0	0	6
692	140	control	0	0	6
693	140	control	0	0	6
694	140	control	0	0	6
695	140	control	0.02	1	2
696	140	control	0.02	1	5
697	140	control	0.02	1	5
698	140	control	0.02	1	6
699	140	control	0.02	1	6
700	140	control	0.02	1	6
701	140	control	0.02	1	6
702	140	control	0.02	1	6
703	140	control	0.02	1	6
704	140	control	0.02	0	6
705	140	control	0.02	0	6
706	140	control	0.02	0	6
707	141	control	0	0	6
708	141	control	0	0	6
709	141	control	0	0	6
710	141	control	0	0	6
711	141	control	0	0	6
712	141	control	0	0	6
713	141	control	0	0	6
714	141	control	0	0	6
715	141	control	0	0	6
716	141	control	0	0	6
717	141	control	0	0	6
718	141	control	0	0	6
719	141	control	0.02	1	2
720	141	control	0.02	1	4
721	141	control	0.02	1	5
722	141	control	0.02	1	5
723	141	control	0.02	1	5
724	141	control	0.02	1	5
725	141	control	0.02	1	6
726	141	control	0.02	1	6
727	141	control	0.02	0	6
728	141	control	0.02	0	6
729	141	control	0.02	0	6
730	141	control	0.02	0	6
731	88	control	0	1	2
732	88	control	0	1	6
733	88	control	0	0	6
734	88	control	0	0	6
735	88	control	0	0	6
736	88	control	0	0	6
737	88	control	0	0	6
738	88	control	0	0	6
739	88	control	0	0	6
740	88	control	0	0	6
741	88	control	0	0	6
742	88	control	0	0	6
743	88	prop 14	0	1	2
744	88	prop 14	0	1	3
745	88	prop 14	0	0	6
746	88	prop 14	0	0	6
747	88	prop 14	0	0	6
748	88	prop 14	0	0	6
749	88	prop 14	0	0	6
750	88	prop 14	0	0	6
751	88	prop 14	0	0	6
752	88	prop 14	0	0	6
753	88	prop 14	0	0	6
754	88	prop 14	0	0	6
755	89	control	0	0	6
756	89	control	0	0	6
757	89	control	0	0	6
758	89	control	0	0	6
759	89	control	0	0	6
760	89	control	0	0	6
761	89	control	0	0	6
762	89	control	0	0	6
763	89	control	0	0	6
764	89	control	0	0	6
765	89	control	0	0	6
766	89	control	0	0	6
767	89	prop 14	0	1	2
768	89	prop 14	0	1	5
769	89	prop 14	0	0	6
770	89	prop 14	0	0	6
771	89	prop 14	0	0	6
772	89	prop 14	0	0	6
773	89	prop 14	0	0	6
774	89	prop 14	0	0	6
775	89	prop 14	0	0	6
776	89	prop 14	0	0	6
777	89	prop 14	0	0	6
778	89	prop 14	0	0	6
779	89	prop 14	0	1	4
780	89	prop 14	0	0	6
781	89	prop 14	0	0	6
782	89	prop 14	0	0	6
783	89	prop 14	0	0	6
784	89	prop 14	0	0	6
785	89	prop 14	0	0	6
786	89	prop 14	0	0	6
787	89	prop 14	0	0	6
788	89	prop 14	0	0	6
789	89	prop 14	0	0	6
790	89	prop 14	0	0	6
791	89	thi1prop14	0	1	2
792	89	thi1prop14	0	1	2
793	89	thi1prop14	0	0	6
794	89	thi1prop14	0	0	6
795	89	thi1prop14	0	0	6
796	89	thi1prop14	0	0	6
797	89	thi1prop14	0	0	6
798	89	thi1prop14	0	0	6
799	89	thi1prop14	0	0	6
800	89	thi1prop14	0	0	6
801	89	thi1prop14	0	0	6
802	89	thi1prop14	0	0	6
803	90	control	0	1	4
804	90	control	0	0	6
805	90	control	0	0	6
806	90	control	0	0	6
807	90	control	0	0	6
808	90	control	0	0	6
809	90	control	0	0	6
810	90	control	0	0	6
811	90	control	0	0	6
812	90	control	0	0	6
813	90	control	0	0	6
814	90	control	0	0	6
815	90	thi1prop14	0	1	2
816	90	thi1prop14	0	1	2
817	90	thi1prop14	0	1	3
818	90	thi1prop14	0	1	4
819	90	thi1prop14	0	0	6
820	90	thi1prop14	0	0	6
821	90	thi1prop14	0	0	6
822	90	thi1prop14	0	0	6
823	90	thi1prop14	0	0	6
824	90	thi1prop14	0	0	6
825	90	thi1prop14	0	0	6
826	90	thi1prop14	0	0	6
827	92	control	0	0	6
828	92	control	0	0	6
829	92	control	0	0	6
830	92	control	0	0	6
831	92	control	0	0	6
832	92	control	0	0	6
833	92	control	0	0	6
834	92	control	0	0	6
835	92	control	0	0	6
836	92	control	0	0	6
837	92	control	0	0	6
838	92	control	0	0	6
839	92	thi1prop14	0	1	2
840	92	thi1prop14	0	0	6
841	92	thi1prop14	0	0	6
842	92	thi1prop14	0	0	6
843	92	thi1prop14	0	0	6
844	92	thi1prop14	0	0	6
845	92	thi1prop14	0	0	6
846	92	thi1prop14	0	0	6
847	92	thi1prop14	0	0	6
848	92	thi1prop14	0	0	6
849	92	thi1prop14	0	0	6
850	92	thi1prop14	0	0	6
851	95	control	0	0	6
852	95	control	0	0	6
853	95	control	0	0	6
854	95	control	0	0	6
855	95	control	0	0	6
856	95	control	0	0	6
857	95	control	0	0	6
858	95	control	0	0	6
859	95	control	0	0	6
860	95	control	0	0	6
861	95	control	0	0	6
862	95	control	0	0	6
863	95	thi1prop14	0	0	6
864	95	thi1prop14	0	0	6
865	95	thi1prop14	0	0	6
866	95	thi1prop14	0	0	6
867	95	thi1prop14	0	0	6
868	95	thi1prop14	0	0	6
869	95	thi1prop14	0	0	6
870	95	thi1prop14	0	0	6
871	95	thi1prop14	0	0	6
872	95	thi1prop14	0	0	6
873	95	thi1prop14	0	0	6
874	95	thi1prop14	0	0	6
875	140	control	0	1	4
876	140	control	0	0	6
877	140	control	0	0	6
878	140	control	0	0	6
879	140	control	0	0	6
880	140	control	0	0	6
881	140	control	0	0	6
882	140	control	0	0	6
883	140	control	0	0	6
884	140	control	0	0	6
885	140	control	0	0	6
886	140	control	0	0	6
887	140	control	0.02	1	2
888	140	control	0.02	1	5
889	140	control	0.02	1	5
890	140	control	0.02	1	6
891	140	control	0.02	1	6
892	140	control	0.02	1	6
893	140	control	0.02	1	6
894	140	control	0.02	1	6
895	140	control	0.02	1	6
896	140	control	0.02	0	6
897	140	control	0.02	0	6
898	140	control	0.02	0	6
899	141	control	0	0	6
900	141	control	0	0	6
901	141	control	0	0	6
902	141	control	0	0	6
903	141	control	0	0	6
904	141	control	0	0	6
905	141	control	0	0	6
906	141	control	0	0	6
907	141	control	0	0	6
908	141	control	0	0	6
909	141	control	0	0	6
910	141	control	0	0	6
911	141	control	0.02	1	2
912	141	control	0.02	1	4
913	141	control	0.02	1	5
914	141	control	0.02	1	5
915	141	control	0.02	1	5
916	141	control	0.02	1	5
917	141	control	0.02	1	6
918	141	control	0.02	1	6
919	141	control	0.02	0	6
920	141	control	0.02	0	6
921	141	control	0.02	0	6
922	141	control	0.02	0	6

## Sheet: BOS
id	plate	tx	bacteria	censor	survive
1	114	control	0	0	6
2	114	control	0	0	6
3	114	control	0	0	6
4	114	control	0	0	6
5	114	control	0	0	6
6	114	control	0	0	6
7	114	control	0	0	6
8	114	control	0	0	6
9	114	control	0	0	6
10	114	control	0	0	6
11	114	control	0	0	6
12	114	control	0	0	6
13	114	thi1bos29	0	0	6
14	114	thi1bos29	0	0	6
15	114	thi1bos29	0	0	6
16	114	thi1bos29	0	0	6
17	114	thi1bos29	0	0	6
18	114	thi1bos29	0	0	6
19	114	thi1bos29	0	0	6
20	114	thi1bos29	0	0	6
21	114	thi1bos29	0	0	6
22	114	thi1bos29	0	0	6
23	114	thi1bos29	0	0	6
24	114	thi1bos29	0.001	1	2
25	114	thi1bos29	0.001	1	3
26	114	thi1bos29	0.001	1	5
27	114	thi1bos29	0.001	1	5
28	114	thi1bos29	0.001	1	5
29	114	thi1bos29	0.001	1	6
30	114	thi1bos29	0.001	0	6
31	114	thi1bos29	0.001	0	6
32	114	thi1bos29	0.001	0	6
33	114	thi1bos29	0.001	0	6
34	114	thi1bos29	0.001	0	6
35	114	thi1bos29	0.001	0	6
36	114	control	0.001	1	2
37	114	control	0.001	1	5
38	114	control	0.001	0	6
39	114	control	0.001	0	6
40	114	control	0.001	0	6
41	114	control	0.001	0	6
42	114	control	0.001	0	6
43	114	control	0.001	0	6
44	114	control	0.001	0	6
45	114	control	0.001	0	6
46	114	control	0.001	0	6
47	114	control	0.001	0	6
48	115	control	0	1	2
49	115	control	0	0	6
50	115	control	0	0	6
51	115	control	0	0	6
52	115	control	0	0	6
53	115	control	0	0	6
54	115	control	0	0	6
55	115	control	0	0	6
56	115	control	0	0	6
57	115	control	0	0	6
58	115	control	0	0	6
59	115	control	0	0	6
60	115	thi1bos29	0.001	1	2
61	115	thi1bos29	0.001	1	4
62	115	thi1bos29	0.001	1	5
63	115	thi1bos29	0.001	1	5
64	115	thi1bos29	0.001	1	6
65	115	thi1bos29	0.001	0	6
66	115	thi1bos29	0.001	0	6
67	115	thi1bos29	0.001	0	6
68	115	thi1bos29	0.001	0	6
69	115	thi1bos29	0.001	0	6
70	115	thi1bos29	0.001	0	6
71	115	thi1bos29	0.001	0	6
72	115	thi1bos29	0.001	1	4
73	115	thi1bos29	0.001	0	6
74	115	thi1bos29	0.001	0	6
75	115	thi1bos29	0.001	0	6
76	115	thi1bos29	0.001	0	6
77	115	thi1bos29	0.001	0	6
78	115	thi1bos29	0.001	0	6
79	115	thi1bos29	0.001	0	6
80	115	thi1bos29	0.001	0	6
81	115	thi1bos29	0.001	0	6
82	115	thi1bos29	0.001	0	6
83	115	thi1bos29	0.001	0	6
84	115	thi1bos29	0.001	1	5
85	115	thi1bos29	0.001	0	6
86	115	thi1bos29	0.001	0	6
87	115	thi1bos29	0.001	0	6
88	115	thi1bos29	0.001	0	6
89	115	thi1bos29	0.001	0	6
90	115	thi1bos29	0.001	0	6
91	115	thi1bos29	0.001	0	6
92	115	thi1bos29	0.001	0	6
93	115	thi1bos29	0.001	0	6
94	115	thi1bos29	0.001	0	6
95	115	thi1bos29	0.001	0	6
96	116	control	0	0	6
97	116	control	0	0	6
98	116	control	0	0	6
99	116	control	0	0	6
100	116	control	0	0	6
101	116	control	0	0	6
102	116	control	0	0	6
103	116	control	0	0	6
104	116	control	0	0	6
105	116	control	0	0	6
106	116	control	0	0	6
107	116	control	0	0	6
108	116	thi1bos29	0.02	1	3
109	116	thi1bos29	0.02	1	4
110	116	thi1bos29	0.02	1	4
111	116	thi1bos29	0.02	1	5
112	116	thi1bos29	0.02	1	5
113	116	thi1bos29	0.02	1	5
114	116	thi1bos29	0.02	1	5
115	116	thi1bos29	0.02	1	5
116	116	thi1bos29	0.02	1	6
117	116	thi1bos29	0.02	0	6
118	116	thi1bos29	0.02	0	6
119	116	thi1bos29	0.02	0	6
120	116	thi1bos29	0.02	1	4
121	116	thi1bos29	0.02	1	4
122	116	thi1bos29	0.02	1	4
123	116	thi1bos29	0.02	1	5
124	116	thi1bos29	0.02	1	5
125	116	thi1bos29	0.02	1	5
126	116	thi1bos29	0.02	1	5
127	116	thi1bos29	0.02	1	6
128	116	thi1bos29	0.02	1	6
129	116	thi1bos29	0.02	1	6
130	116	thi1bos29	0.02	0	6
131	116	thi1bos29	0.02	0	6
132	116	control	0.02	1	2
133	116	control	0.02	1	4
134	116	control	0.02	1	4
135	116	control	0.02	1	4
136	116	control	0.02	1	4
137	116	control	0.02	1	5
138	116	control	0.02	1	5
139	116	control	0.02	1	5
140	116	control	0.02	1	6
141	116	control	0.02	1	6
142	116	control	0.02	1	6
143	116	control	0.02	1	6
144	117	control	0	0	6
145	117	control	0	0	6
146	117	control	0	0	6
147	117	control	0	0	6
148	117	control	0	0	6
149	117	control	0	0	6
150	117	control	0	0	6
151	117	control	0	0	6
152	117	control	0	0	6
153	117	control	0	0	6
154	117	control	0	0	6
155	117	control	0	0	6
156	117	thi1bos29	0.01	1	2
157	117	thi1bos29	0.01	1	4
158	117	thi1bos29	0.01	1	4
159	117	thi1bos29	0.01	1	5
160	117	thi1bos29	0.01	1	5
161	117	thi1bos29	0.01	1	5
162	117	thi1bos29	0.01	1	5
163	117	thi1bos29	0.01	1	5
164	117	thi1bos29	0.01	1	5
165	117	thi1bos29	0.01	1	6
166	117	thi1bos29	0.01	1	6
167	117	thi1bos29	0.01	0	6
168	117	thi1bos29	0.01	1	4
169	117	thi1bos29	0.01	1	5
170	117	thi1bos29	0.01	1	5
171	117	thi1bos29	0.01	1	5
172	117	thi1bos29	0.01	1	6
173	117	thi1bos29	0.01	1	6
174	117	thi1bos29	0.01	1	6
175	117	thi1bos29	0.01	1	6
176	117	thi1bos29	0.01	0	6
177	117	thi1bos29	0.01	0	6
178	117	thi1bos29	0.01	0	6
179	117	thi1bos29	0.01	0	6
180	117	control	0.01	1	5
181	117	control	0.01	1	5
182	117	control	0.01	1	5
183	117	control	0.01	1	5
184	117	control	0.01	1	5
185	117	control	0.01	1	5
186	117	control	0.01	1	5
187	117	control	0.01	1	5
188	117	control	0.01	1	6
189	117	control	0.01	1	6
190	117	control	0.01	1	6
191	117	control	0.01	0	6
192	119	control	0	1	2
193	119	control	0	0	6
194	119	control	0	0	6
195	119	control	0	0	6
196	119	control	0	0	6
197	119	control	0	0	6
198	119	control	0	0	6
199	119	control	0	0	6
200	119	control	0	0	6
201	119	control	0	0	6
202	119	control	0	0	6
203	119	control	0	0	6
204	119	bos29	0.01	1	2
205	119	bos29	0.01	1	3
206	119	bos29	0.01	1	3
207	119	bos29	0.01	1	4
208	119	bos29	0.01	1	4
209	119	bos29	0.01	1	4
210	119	bos29	0.01	1	4
211	119	bos29	0.01	1	5
212	119	bos29	0.01	1	6
213	119	bos29	0.01	1	6
214	119	bos29	0.01	1	6
215	119	bos29	0.01	0	6
216	119	thi1bos29	0.01	1	2
217	119	thi1bos29	0.01	1	3
218	119	thi1bos29	0.01	1	3
219	119	thi1bos29	0.01	1	3
220	119	thi1bos29	0.01	1	4
221	119	thi1bos29	0.01	1	4
222	119	thi1bos29	0.01	1	5
223	119	thi1bos29	0.01	1	6
224	119	thi1bos29	0.01	1	6
225	119	thi1bos29	0.01	1	6
226	119	thi1bos29	0.01	0	6
227	119	thi1bos29	0.01	0	6
228	119	control	0.01	1	6
229	119	control	0.01	1	6
230	119	control	0.01	1	6
231	119	control	0.01	1	6
232	119	control	0.01	1	6
233	119	control	0.01	1	6
234	119	control	0.01	1	6
235	119	control	0.01	1	6
236	119	control	0.01	1	6
237	119	control	0.01	1	6
238	119	control	0.01	1	6
239	119	control	0.01	1	6
240	120	control	0	1	1
241	120	control	0	0	6
242	120	control	0	0	6
243	120	control	0	0	6
244	120	control	0	0	6
245	120	control	0	0	6
246	120	control	0	0	6
247	120	control	0	0	6
248	120	control	0	0	6
249	120	control	0	0	6
250	120	control	0	0	6
251	120	control	0	0	6
252	120	bos29	0.02	1	2
253	120	bos29	0.02	1	3
254	120	bos29	0.02	1	3
255	120	bos29	0.02	1	4
256	120	bos29	0.02	1	4
257	120	bos29	0.02	1	4
258	120	bos29	0.02	1	4
259	120	bos29	0.02	1	4
260	120	bos29	0.02	1	6
261	120	bos29	0.02	1	6
262	120	bos29	0.02	1	6
263	120	bos29	0.02	0	6
264	120	thi1bos29	0.02	1	2
265	120	thi1bos29	0.02	1	3
266	120	thi1bos29	0.02	1	3
267	120	thi1bos29	0.02	1	4
268	120	thi1bos29	0.02	1	4
269	120	thi1bos29	0.02	1	4
270	120	thi1bos29	0.02	1	4
271	120	thi1bos29	0.02	1	6
272	120	thi1bos29	0.02	1	6
273	120	thi1bos29	0.02	1	6
274	120	thi1bos29	0.02	1	6
275	120	thi1bos29	0.02	1	6
276	120	control	0.02	1	2
277	120	control	0.02	1	3
278	120	control	0.02	1	3
279	120	control	0.02	1	3
280	120	control	0.02	1	4
281	120	control	0.02	1	4
282	120	control	0.02	1	6
283	120	control	0.02	1	6
284	120	control	0.02	1	6
285	120	control	0.02	1	6
286	120	control	0.02	1	6
287	120	control	0.02	1	6
288	121	control	0	0	6
289	121	control	0	0	6
290	121	control	0	0	6
291	121	control	0	0	6
292	121	control	0	0	6
293	121	control	0	0	6
294	121	control	0	0	6
295	121	control	0	0	6
296	121	control	0	0	6
297	121	control	0	0	6
298	121	control	0	0	6
299	121	control	0	0	6
300	121	bos29	0.001	1	2
301	121	bos29	0.001	1	5
302	121	bos29	0.001	1	5
303	121	bos29	0.001	0	6
304	121	bos29	0.001	0	6
305	121	bos29	0.001	0	6
306	121	bos29	0.001	0	6
307	121	bos29	0.001	0	6
308	121	bos29	0.001	0	6
309	121	bos29	0.001	0	6
310	121	bos29	0.001	0	6
311	121	bos29	0.001	0	6
312	121	bos29	0.001	1	5
313	121	bos29	0.001	1	5
314	121	bos29	0.001	0	6
315	121	bos29	0.001	0	6
316	121	bos29	0.001	0	6
317	121	bos29	0.001	0	6
318	121	bos29	0.001	0	6
319	121	bos29	0.001	0	6
320	121	bos29	0.001	0	6
321	121	bos29	0.001	0	6
322	121	bos29	0.001	0	6
323	121	bos29	0.001	0	6
324	121	control	0.001	1	2
325	121	control	0.001	1	4
326	121	control	0.001	1	5
327	121	control	0.001	1	5
328	121	control	0.001	1	6
329	121	control	0.001	1	6
330	121	control	0.001	1	6
331	121	control	0.001	0	6
332	121	control	0.001	0	6
333	121	control	0.001	0	6
334	121	control	0.001	0	6
335	121	control	0.001	0	6
336	122	control	0	0	6
337	122	control	0	0	6
338	122	control	0	0	6
339	122	control	0	0	6
340	122	control	0	0	6
341	122	control	0	0	6
342	122	control	0	0	6
343	122	control	0	0	6
344	122	control	0	0	6
345	122	control	0	0	6
346	122	control	0	0	6
347	122	control	0	0	6
348	122	bos29	0.001	1	2
349	122	bos29	0.001	1	4
350	122	bos29	0.001	1	5
351	122	bos29	0.001	1	5
352	122	bos29	0.001	1	5
353	122	bos29	0.001	1	6
354	122	bos29	0.001	1	6
355	122	bos29	0.001	0	6
356	122	bos29	0.001	0	6
357	122	bos29	0.001	0	6
358	122	bos29	0.001	0	6
359	122	bos29	0.001	0	6
360	122	bos29	0.02	1	4
361	122	bos29	0.02	1	5
362	122	bos29	0.02	1	5
363	122	bos29	0.02	1	5
364	122	bos29	0.02	1	5
365	122	bos29	0.02	1	5
366	122	bos29	0.02	1	5
367	122	bos29	0.02	1	5
368	122	bos29	0.02	1	5
369	122	bos29	0.02	1	6
370	122	bos29	0.02	0	6
371	122	bos29	0.02	0	6
372	122	control	0.02	1	4
373	122	control	0.02	1	4
374	122	control	0.02	1	5
375	122	control	0.02	1	5
376	122	control	0.02	1	5
377	122	control	0.02	1	5
378	122	control	0.02	1	5
379	122	control	0.02	1	6
380	122	control	0.02	1	6
381	122	control	0.02	1	6
382	122	control	0.02	0	6
383	122	control	0.02	0	6
384	123	control	0	0	6				0
385	123	control	0	0	6				0
386	123	control	0	0	6				0
387	123	control	0	0	6				0
388	123	control	0	0	6				0
389	123	control	0	0	6				0
390	123	control	0	0	6				0
391	123	control	0	0	6				0
392	123	control	0	0	6				0
393	123	control	0	0	6				0
394	123	control	0	0	6				0
395	123	control	0	0	6				0
396	123	bos29	0.02	1	5
397	123	bos29	0.02	1	5
398	123	bos29	0.02	1	5
399	123	bos29	0.02	1	5
400	123	bos29	0.02	1	6
401	123	bos29	0.02	1	6
402	123	bos29	0.02	1	6
403	123	bos29	0.02	1	6
404	123	bos29	0.02	0	6
405	123	bos29	0.02	0	6
406	123	bos29	0.02	0	6
407	123	bos29	0.02	0	6
408	123	bos29	0.01	1	4
409	123	bos29	0.01	1	4
410	123	bos29	0.01	1	5
411	123	bos29	0.01	1	5
412	123	bos29	0.01	1	5
413	123	bos29	0.01	1	5
414	123	bos29	0.01	1	5
415	123	bos29	0.01	1	6
416	123	bos29	0.01	1	6
417	123	bos29	0.01	1	6
418	123	bos29	0.01	1	6
419	123	bos29	0.01	0	6
420	123	control	0.01	1	3
421	123	control	0.01	1	4
422	123	control	0.01	1	4
423	123	control	0.01	1	4
424	123	control	0.01	1	4
425	123	control	0.01	1	4
426	123	control	0.01	1	4
427	123	control	0.01	1	5
428	123	control	0.01	1	5
429	123	control	0.01	1	5
430	123	control	0.01	1	6
431	123	control	0.01	1	6
432	157	control	0	0	6
433	157	control	0	0	6
434	157	control	0	0	6
435	157	control	0	0	6
436	157	control	0	0	6
437	157	control	0	0	6
438	157	control	0	0	6
439	157	control	0	0	6
440	157	control	0	0	6
441	157	control	0	0	6
442	157	control	0	0	6
443	157	control	0	0	6
444	157	bos29	0.02	1	6
445	157	bos29	0.02	1	6
446	157	bos29	0.02	1	6
447	157	bos29	0.02	1	6
448	157	bos29	0.02	1	6
449	157	bos29	0.02	1	6
450	157	bos29	0.02	1	6
451	157	bos29	0.02	1	6
452	157	bos29	0.02	1	6
453	157	bos29	0.02	1	6
454	157	bos29	0.02	1	6
455	157	bos29	0.02	1	6
456	157	thi1bos29	0.02	1	3
457	157	thi1bos29	0.02	1	5
458	157	thi1bos29	0.02	1	5
459	157	thi1bos29	0.02	1	5
460	157	thi1bos29	0.02	1	5
461	157	thi1bos29	0.02	1	6
462	157	thi1bos29	0.02	1	6
463	157	thi1bos29	0.02	1	6
464	157	thi1bos29	0.02	1	6
465	157	thi1bos29	0.02	1	6
466	157	thi1bos29	0.02	1	6
467	157	thi1bos29	0.02	0	6
468	157	thi1bos29	0.01	1	3
469	157	thi1bos29	0.01	1	4
470	157	thi1bos29	0.01	1	4
471	157	thi1bos29	0.01	1	4
472	157	thi1bos29	0.01	1	4
473	157	thi1bos29	0.01	1	5
474	157	thi1bos29	0.01	1	5
475	157	thi1bos29	0.01	1	6
476	157	thi1bos29	0.01	1	6
477	157	thi1bos29	0.01	1	6
478	157	thi1bos29	0.01	1	6
479	157	thi1bos29	0.01	1	6
480	152	control	0.001	1	3
481	152	control	0.001	1	4
482	152	control	0.001	1	4
483	152	control	0.001	1	4
484	152	control	0.001	1	5
485	152	control	0.001	1	5
486	152	control	0.001	1	6
487	152	control	0.001	0	6
488	152	control	0.001	0	6
489	152	control	0.001	0	6
490	152	control	0.001	0	6
491	152	control	0.001	0	6
492	152	control	0.001	1	2
493	152	control	0.001	1	4
494	152	control	0.001	1	4
495	152	control	0.001	1	4
496	152	control	0.001	1	5
497	152	control	0.001	1	6
498	152	control	0.001	0	6
499	152	control	0.001	0	6
500	152	control	0.001	0	6
501	152	control	0.001	0	6
502	152	control	0.001	0	6
503	152	control	0.001	0	6
504	152	control	0	1	3
505	152	control	0	0	6
506	152	control	0	0	6
507	152	control	0	0	6
508	152	control	0	0	6
509	152	control	0	0	6
510	152	control	0	0	6
511	152	control	0	0	6
512	152	control	0	0	6
513	152	control	0	0	6
514	152	control	0	0	6
515	152	control	0	0	6
516	150	control	0	1	4
517	150	control	0	1	1
518	150	control	0	0	6
519	150	control	0	0	6
520	150	control	0	0	6
521	150	control	0	0	6
522	150	control	0	0	6
523	150	control	0	0	6
524	150	control	0	0	6
525	150	control	0	0	6
526	150	control	0	0	6
527	150	control	0	0	6
528	150	thi1bos29	0	1	4
529	150	thi1bos29	0	0	6
530	150	thi1bos29	0	0	6
531	150	thi1bos29	0	0	6
532	150	thi1bos29	0	0	6
533	150	thi1bos29	0	0	6
534	150	thi1bos29	0	0	6
535	150	thi1bos29	0	0	6
536	150	thi1bos29	0	0	6
537	150	thi1bos29	0	0	6
538	150	thi1bos29	0	0	6
539	150	thi1bos29	0	0	6
540	150	bos29	0.001	1	4
541	150	bos29	0.001	1	4
542	150	bos29	0.001	1	5
543	150	bos29	0.001	1	5
544	150	bos29	0.001	1	5
545	150	bos29	0.001	1	5
546	150	bos29	0.001	0	6
547	150	bos29	0.001	0	6
548	150	bos29	0.001	0	6
549	150	bos29	0.001	0	6
550	150	bos29	0.001	0	6
551	150	bos29	0.001	0	6
552	150	bos29	0.01	1	1
553	150	bos29	0.01	1	3
554	150	bos29	0.01	1	4
555	150	bos29	0.01	1	4
556	150	bos29	0.01	1	4
557	150	bos29	0.01	1	5
558	150	bos29	0.01	1	5
559	150	bos29	0.01	1	5
560	150	bos29	0.01	1	5
561	150	bos29	0.01	1	5
562	150	bos29	0.01	1	5
563	150	bos29	0.01	0	6
564	147	control	0	1	4
565	147	control	0	0	6
566	147	control	0	0	6
567	147	control	0	0	6
568	147	control	0	0	6
569	147	control	0	0	6
570	147	control	0	0	6
571	147	control	0	0	6
572	147	control	0	0	6
573	147	control	0	0	6
574	147	control	0	0	6
575	147	control	0	0	6
576	147	bos29	0.01	1	4
577	147	bos29	0.01	1	4
578	147	bos29	0.01	1	4
579	147	bos29	0.01	1	4
580	147	bos29	0.01	1	4
581	147	bos29	0.01	1	4
582	147	bos29	0.01	1	5
583	147	bos29	0.01	1	5
584	147	bos29	0.01	1	5
585	147	bos29	0.01	1	5
586	147	bos29	0.01	0	6
587	147	thi1bos29	0.01	1	4
588	147	thi1bos29	0.01	1	4
589	147	thi1bos29	0.01	1	4
590	147	thi1bos29	0.01	1	4
591	147	thi1bos29	0.01	1	4
592	147	thi1bos29	0.01	1	4
593	147	thi1bos29	0.01	1	4
594	147	thi1bos29	0.01	1	4
595	147	thi1bos29	0.01	1	5
596	147	thi1bos29	0.01	1	5
597	147	thi1bos29	0.01	1	5
598	147	thi1bos29	0.01	1	6
599	147	control	0.01	1	1
600	147	control	0.01	1	4
601	147	control	0.01	1	4
602	147	control	0.01	1	4
603	147	control	0.01	1	4
604	147	control	0.01	1	4
605	147	control	0.01	1	4
606	147	control	0.01	1	4
607	147	control	0.01	1	4
608	147	control	0.01	1	4
609	147	control	0.01	1	6
610	147	control	0.01	1	6
611	148	control	0	1	1
612	148	control	0	1	2				0
613	148	control	0	0	6				0
614	148	control	0	0	6				0
615	148	control	0	0	6				0
616	148	control	0	0	6				0
617	148	control	0	0	6				0
618	148	control	0	0	6				0
619	148	control	0	0	6				0
620	148	control	0	0	6				0
621	148	control	0	0	6				0
622	148	control	0	0	6				0
623	148	bos29	0	0	6
624	148	bos29	0	0	6
625	148	bos29	0	0	6
626	148	bos29	0	0	6
627	148	bos29	0	0	6
628	148	bos29	0	0	6
629	148	bos29	0	0	6
630	148	bos29	0	0	6
631	148	bos29	0	0	6
632	148	bos29	0	0	6
633	148	bos29	0	0	6
634	148	bos29	0	0	6
635	148	bos29	0	0	6
636	148	bos29	0	0	6
637	148	bos29	0	0	6
638	148	bos29	0	0	6
639	148	bos29	0	0	6
640	148	bos29	0	0	6
641	148	bos29	0	0	6
642	148	bos29	0	0	6
643	148	bos29	0	0	6
644	148	bos29	0	0	6
645	148	bos29	0	0	6
646	148	bos29	0	0	6
647	148	thi1bos29	0	1	4
648	148	thi1bos29	0	1	5
649	148	thi1bos29	0	0	6
650	148	thi1bos29	0	0	6
651	148	thi1bos29	0	0	6
652	148	thi1bos29	0	0	6
653	148	thi1bos29	0	0	6
654	148	thi1bos29	0	0	6
655	148	thi1bos29	0	0	6
656	148	thi1bos29	0	0	6
657	148	thi1bos29	0	0	6
658	148	thi1bos29	0	0	6
659	73	control	0	1	2
660	73	control	0	0	6
661	73	control	0	0	6
662	73	control	0	0	6
663	73	control	0	0	6
664	73	control	0	0	6
665	73	control	0	0	6
666	73	control	0	0	6
667	73	control	0	0	6
668	73	control	0	0	6
669	73	control	0	0	6
670	73	control	0	0	6
671	73	thi1bos29	0	1	2
672	73	thi1bos29	0	1	4
673	73	thi1bos29	0	0	6
674	73	thi1bos29	0	0	6
675	73	thi1bos29	0	0	6
676	73	thi1bos29	0	0	6
677	73	thi1bos29	0	0	6
678	73	thi1bos29	0	0	6
679	73	thi1bos29	0	0	6
680	73	thi1bos29	0	0	6
681	73	thi1bos29	0	0	6
682	73	thi1bos29	0	0	6
683	75	control	0	1	2
684	75	control	0	1	4
685	75	control	0	0	6
686	75	control	0	0	6
687	75	control	0	0	6
688	75	control	0	0	6
689	75	control	0	0	6
690	75	control	0	0	6
691	75	control	0	0	6
692	75	control	0	0	6
693	75	control	0	0	6
694	75	control	0	0	6
695	75	bos29	0	1	3
696	75	bos29	0	1	4
697	75	bos29	0	0	6
698	75	bos29	0	0	6
699	75	bos29	0	0	6
700	75	bos29	0	0	6
701	75	bos29	0	0	6
702	75	bos29	0	0	6
703	75	bos29	0	0	6
704	75	bos29	0	0	6
705	75	bos29	0	0	6
706	75	bos29	0	0	6
707	83	control	0	0	6
708	83	control	0	0	6				0
709	83	control	0	0	6				0
710	83	control	0	0	6				0
711	83	control	0	0	6				0
712	83	control	0	0	6				0
713	83	control	0	0	6				0
714	83	control	0	0	6				0
715	83	control	0	0	6				0
716	83	control	0	0	6				0
717	83	control	0	0	6				0
718	83	control	0	0	6				0
719	83	bos29	0	1	4				0
720	83	bos29	0	0	6
721	83	bos29	0	0	6
722	83	bos29	0	0	6
723	83	bos29	0	0	6
724	83	bos29	0	0	6
725	83	bos29	0	0	6
726	83	bos29	0	0	6
727	83	bos29	0	0	6
728	83	bos29	0	0	6
729	83	bos29	0	0	6
730	83	bos29	0	0	6
731	158	control	0	0	6
732	158	control	0	0	6
733	158	control	0	0	6
734	158	control	0	0	6
735	158	control	0	0	6
736	158	control	0	0	6
737	158	control	0	0	6
738	158	control	0	0	6
739	158	control	0	0	6
740	158	control	0	0	6
741	158	control	0	0	6
742	158	control	0	0	6
743	158	control	0.02	1	4
744	158	control	0.02	1	4
745	158	control	0.02	1	5
746	158	control	0.02	1	5
747	158	control	0.02	1	6
748	158	control	0.02	1	6
749	158	control	0.02	1	6
750	158	control	0.02	1	6
751	158	control	0.02	1	6
752	158	control	0.02	1	6
753	158	control	0.02	1	6
754	158	control	0.02	0	6

## Sheet: PYR
id	plate	tx	bacteria	censor	survive
1	124	control	0	0	6
2	124	control	0	0	6
3	124	control	0	0	6
4	124	control	0	0	6
5	124	control	0	0	6
6	124	control	0	0	6
7	124	control	0	0	6
8	124	control	0	0	6
9	124	control	0	0	6
10	124	control	0	0	6
11	124	control	0	0	6
12	124	control	0	0	6
13	124	pyr14	0	0	6
14	124	pyr14	0	0	6
15	124	pyr14	0	0	6
16	124	pyr14	0	0	6
17	124	pyr14	0	0	6
18	124	pyr14	0	0	6
19	124	pyr14	0	0	6
20	124	pyr14	0	0	6
21	124	pyr14	0	0	6
22	124	pyr14	0	0	6
23	124	pyr14	0	0	6
24	124	pyr14	0	0	6
25	124	pyr14	0.001	1	4
26	124	pyr14	0.001	1	4
27	124	pyr14	0.001	1	5
28	124	pyr14	0.001	1	5
29	124	pyr14	0.001	0	6
30	124	pyr14	0.001	0	6
31	124	pyr14	0.001	0	6
32	124	pyr14	0.001	0	6
33	124	pyr14	0.001	0	6
34	124	pyr14	0.001	0	6
35	124	pyr14	0.001	0	6
36	124	control	0.001	1	4
37	124	control	0.001	1	5
38	124	control	0.001	1	6
39	124	control	0.001	1	6
40	124	control	0.001	1	6
41	124	control	0.001	1	6
42	124	control	0.001	0	6
43	124	control	0.001	0	6
44	124	control	0.001	0	6
45	124	control	0.001	0	6
46	124	control	0.001	0	6
47	124	control	0.001	0	6
48	125	control	0	1	2
49	125	control	0	0	6
50	125	control	0	0	6
51	125	control	0	0	6
52	125	control	0	0	6
53	125	control	0	0	6
54	125	control	0	0	6
55	125	control	0	0	6
56	125	control	0	0	6
57	125	control	0	0	6
58	125	control	0	0	6
59	125	control	0	0	6
60	125	pyr14	0	0	6
61	125	pyr14	0	0	6
62	125	pyr14	0	0	6
63	125	pyr14	0	0	6
64	125	pyr14	0	0	6
65	125	pyr14	0	0	6
66	125	pyr14	0	0	6
67	125	pyr14	0	0	6
68	125	pyr14	0	0	6
69	125	pyr14	0	0	6
70	125	pyr14	0	0	6
71	125	pyr14	0	0	6
72	125	pyr14	0.01	1	4
73	125	pyr14	0.01	1	4
74	125	pyr14	0.01	1	5
75	125	pyr14	0.01	1	5
76	125	pyr14	0.01	1	5
77	125	pyr14	0.01	1	5
78	125	pyr14	0.01	1	5
79	125	pyr14	0.01	1	5
80	125	pyr14	0.01	1	6
81	125	pyr14	0.01	1	6
82	125	pyr14	0.01	0	6
83	125	pyr14	0.01	0	6
84	125	control	0.01	1	4
85	125	control	0.01	1	4
86	125	control	0.01	1	4
87	125	control	0.01	1	4
88	125	control	0.01	1	4
89	125	control	0.01	1	5
90	125	control	0.01	1	5
91	125	control	0.01	1	5
92	125	control	0.01	1	6
93	125	control	0.01	1	6
94	125	control	0.01	1	6
95	125	control	0.01	1	6
96	126	control	0	1	5
97	126	control	0	0	6
98	126	control	0	0	6
99	126	control	0	0	6
100	126	control	0	0	6
101	126	control	0	0	6
102	126	control	0	0	6
103	126	control	0	0	6
104	126	control	0	0	6
105	126	control	0	0	6
106	126	control	0	0	6
107	126	pyr14	0	0	6
108	126	pyr14	0	0	6
109	126	pyr14	0	0	6
110	126	pyr14	0	0	6
111	126	pyr14	0	0	6
112	126	pyr14	0	0	6
113	126	pyr14	0	0	6
114	126	pyr14	0	0	6
115	126	pyr14	0	0	6
116	126	pyr14	0	0	6
117	126	pyr14	0	0	6
118	126	pyr14	0	0	6
119	126	pyr14	0.02	1	4
120	126	pyr14	0.02	1	4
121	126	pyr14	0.02	1	4
122	126	pyr14	0.02	1	4
123	126	pyr14	0.02	1	5
124	126	pyr14	0.02	1	5
125	126	pyr14	0.02	1	5
126	126	pyr14	0.02	1	6
127	126	pyr14	0.02	1	6
128	126	pyr14	0.02	1	6
129	126	pyr14	0.02	1	6
130	126	pyr14	0.02	0	6
131	126	control	0.02	1	4
132	126	control	0.02	1	4
133	126	control	0.02	1	4
134	126	control	0.02	1	4
135	126	control	0.02	1	5
136	126	control	0.02	1	5
137	126	control	0.02	1	5
138	126	control	0.02	1	6
139	126	control	0.02	1	6
140	126	control	0.02	0	6
141	126	control	0.02	0	6
142	126	control	0.02	0	6
143	127	control	0	1	3
144	127	control	0	0	6
145	127	control	0	0	6
146	127	control	0	0	6
147	127	control	0	0	6
148	127	control	0	0	6
149	127	control	0	0	6
150	127	control	0	0	6
151	127	control	0	0	6
152	127	control	0	0	6
153	127	control	0	0	6
154	127	control	0	0	6
155	127	pyr14	0	0	6
156	127	pyr14	0	0	6
157	127	pyr14	0	0	6
158	127	pyr14	0	0	6
159	127	pyr14	0	0	6
160	127	pyr14	0	0	6
161	127	pyr14	0	0	6
162	127	pyr14	0	0	6
163	127	pyr14	0	0	6
164	127	pyr14	0	0	6
165	127	pyr14	0	0	6
166	127	pyr14	0	0	6
167	127	pyr14	0.02	1	4
168	127	pyr14	0.02	1	4
169	127	pyr14	0.02	1	5
170	127	pyr14	0.02	1	5
171	127	pyr14	0.02	1	5
172	127	pyr14	0.02	1	6
173	127	pyr14	0.02	1	6
174	127	pyr14	0.02	1	6
175	127	pyr14	0.02	1	6
176	127	pyr14	0.02	1	6
177	127	pyr14	0.02	1	6
178	127	pyr14	0.02	0	6
179	127	pyr14	0.02	1	4
180	127	pyr14	0.02	1	5
181	127	pyr14	0.02	1	5
182	127	pyr14	0.02	1	5
183	127	pyr14	0.02	1	6
184	127	pyr14	0.02	1	6
185	127	pyr14	0.02	1	6
186	127	pyr14	0.02	1	6
187	127	pyr14	0.02	0	6
188	127	pyr14	0.02	0	6
189	127	pyr14	0.02	0	6
190	127	pyr14	0.02	0	6
191	129	control	0	0	6
192	129	control	0	0	6
193	129	control	0	0	6
194	129	control	0	0	6
195	129	control	0	0	6
196	129	control	0	0	6
197	129	control	0	0	6
198	129	control	0	0	6
199	129	control	0	0	6
200	129	control	0	0	6
201	129	control	0	0	6
202	129	control	0	0	6
203	129	pyr14	0.001	1	2
204	129	pyr14	0.001	1	5
205	129	pyr14	0.001	1	5
206	129	pyr14	0.001	1	5
207	129	pyr14	0.001	1	6
208	129	pyr14	0.001	1	6
209	129	pyr14	0.001	1	6
210	129	pyr14	0.001	0	6
211	129	pyr14	0.001	0	6
212	129	pyr14	0.001	0	6
213	129	pyr14	0.001	0	6
214	129	pyr14	0.001	0	6
215	129	pyr14	0.02	1	4
216	129	pyr14	0.02	1	5
217	129	pyr14	0.02	1	5
218	129	pyr14	0.02	1	6
219	129	pyr14	0.02	1	6
220	129	pyr14	0.02	1	6
221	129	pyr14	0.02	1	6
222	129	pyr14	0.02	1	6
223	129	pyr14	0.02	1	6
224	129	pyr14	0.02	0	6
225	129	pyr14	0.02	0	6
226	129	pyr14	0.02	0	6
227	129	control	0.02	1	0
228	129	control	0.02	1	3
229	129	control	0.02	1	3
230	129	control	0.02	1	4
231	129	control	0.02	1	4
232	129	control	0.02	1	4
233	129	control	0.02	1	5
234	129	control	0.02	1	6
235	129	control	0.02	1	6
236	129	control	0.02	1	6
237	129	control	0.02	1	6
238	129	control	0.02	1	6
239	130	control	0	0	6
240	130	control	0	0	6
241	130	control	0	0	6
242	130	control	0	0	6
243	130	control	0	0	6
244	130	control	0	0	6
245	130	control	0	0	6
246	130	control	0	0	6
247	130	control	0	0	6
248	130	control	0	0	6
249	130	control	0	0	6
250	130	control	0	0	6
251	130	pyr14	0.01	1	1
252	130	pyr14	0.01	1	2
253	130	pyr14	0.01	1	3
254	130	pyr14	0.01	1	5
255	130	pyr14	0.01	1	5
256	130	pyr14	0.01	1	6
257	130	pyr14	0.01	1	6
258	130	pyr14	0.01	1	6
259	130	pyr14	0.01	0	6
260	130	pyr14	0.01	0	6
261	130	pyr14	0.01	0	6
262	130	pyr14	0.01	0	6
263	130	pyr14	0.01	1	3
264	130	pyr14	0.01	1	4
265	130	pyr14	0.01	1	5
266	130	pyr14	0.01	1	5
267	130	pyr14	0.01	1	6
268	130	pyr14	0.01	1	6
269	130	pyr14	0.01	1	6
270	130	pyr14	0.01	1	6
271	130	pyr14	0.01	1	6
272	130	pyr14	0.01	1	6
273	130	pyr14	0.01	0	6
274	130	pyr14	0.01	0	6
275	130	control	0.01	1	3
276	130	control	0.01	1	3
277	130	control	0.01	1	4
278	130	control	0.01	1	4
279	130	control	0.01	1	4
280	130	control	0.01	1	5
281	130	control	0.01	1	5
282	130	control	0.01	1	5
283	130	control	0.01	1	5
284	130	control	0.01	1	6
285	130	control	0.01	1	6
286	130	control	0.01	0	6
287	131	control	0	0	6
288	131	control	0	0	6
289	131	control	0	0	6
290	131	control	0	0	6
291	131	control	0	0	6
292	131	control	0	0	6
293	131	control	0	0	6
294	131	control	0	0	6
295	131	control	0	0	6
296	131	control	0	0	6
297	131	control	0	0	6
298	131	control	0	0	6
299	131	pyr14	0.001	1	5
300	131	pyr14	0.001	1	5
301	131	pyr14	0.001	1	5
302	131	pyr14	0.001	1	5
303	131	pyr14	0.001	1	6
304	131	pyr14	0.001	1	6
305	131	pyr14	0.001	1	6
306	131	pyr14	0.001	0	6
307	131	pyr14	0.001	0	6
308	131	pyr14	0.001	0	6
309	131	pyr14	0.001	0	6
310	131	pyr14	0.001	0	6
311	131	pyr14	0.001	1	4
312	131	pyr14	0.001	1	5
313	131	pyr14	0.001	1	6
314	131	pyr14	0.001	1	6
315	131	pyr14	0.001	0	6
316	131	pyr14	0.001	0	6
317	131	pyr14	0.001	0	6
318	131	pyr14	0.001	0	6
319	131	pyr14	0.001	0	6
320	131	pyr14	0.001	0	6
321	131	pyr14	0.001	0	6
322	131	control	0.001	1	3
323	131	control	0.001	1	4
324	131	control	0.001	1	5
325	131	control	0.001	1	5
326	131	control	0.001	1	5
327	131	control	0.001	1	5
328	131	control	0.001	1	5
329	131	control	0.001	0	6
330	131	control	0.001	0	6
331	131	control	0.001	0	6
332	131	control	0.001	0	6
333	131	control	0.001	0	6
334	133	control	0	0	6
335	133	control	0	0	6
336	133	control	0	0	6
337	133	control	0	0	6
338	133	control	0	0	6
339	133	control	0	0	6
340	133	control	0	0	6
341	133	control	0	0	6
342	133	control	0	0	6
343	133	control	0	0	6
344	133	control	0	0	6
345	133	control	0	0	6
346	133	thi1pyr14	0	1	1
347	133	thi1pyr14	0	0	6
348	133	thi1pyr14	0	0	6
349	133	thi1pyr14	0	0	6
350	133	thi1pyr14	0	0	6
351	133	thi1pyr14	0	0	6
352	133	thi1pyr14	0	0	6
353	133	thi1pyr14	0	0	6
354	133	thi1pyr14	0	0	6
355	133	thi1pyr14	0	0	6
356	133	thi1pyr14	0	0	6
357	133	thi1pyr14	0	0	6
358	133	thi1pyr14	0.01	1	3
359	133	thi1pyr14	0.01	1	4
360	133	thi1pyr14	0.01	1	4
361	133	thi1pyr14	0.01	1	5
362	133	thi1pyr14	0.01	1	6
363	133	thi1pyr14	0.01	1	6
364	133	thi1pyr14	0.01	1	6
365	133	thi1pyr14	0.01	1	6
366	133	thi1pyr14	0.01	1	6
367	133	thi1pyr14	0.01	1	6
368	133	thi1pyr14	0.01	1	6
369	133	thi1pyr14	0.01	0	6
370	133	control	0.01	1	3
371	133	control	0.01	1	4
372	133	control	0.01	1	4
373	133	control	0.01	1	5
374	133	control	0.01	1	5
375	133	control	0.01	1	5
376	133	control	0.01	1	6
377	133	control	0.01	1	6
378	133	control	0.01	1	6
379	133	control	0.01	1	6
380	133	control	0.01	1	6
381	133	control	0.01	0	6
382	134	control	0	1	6
383	134	control	0	0	6
384	134	control	0	0	6
385	134	control	0	0	6
386	134	control	0	0	6
387	134	control	0	0	6
388	134	control	0	0	6
389	134	control	0	0	6
390	134	control	0	0	6
391	134	control	0	0	6
392	134	control	0	0	6
393	134	control	0	0	6
394	134	thi1pyr14	0	0	6
395	134	thi1pyr14	0	0	6
396	134	thi1pyr14	0	0	6
397	134	thi1pyr14	0	0	6
398	134	thi1pyr14	0	0	6
399	134	thi1pyr14	0	0	6
400	134	thi1pyr14	0	0	6
401	134	thi1pyr14	0	0	6
402	134	thi1pyr14	0	0	6
403	134	thi1pyr14	0	0	6
404	134	thi1pyr14	0	0	6
405	134	thi1pyr14	0	0	6
406	134	thi1pyr14	0.02	1	3
407	134	thi1pyr14	0.02	1	4
408	134	thi1pyr14	0.02	1	4
409	134	thi1pyr14	0.02	1	4
410	134	thi1pyr14	0.02	1	4
411	134	thi1pyr14	0.02	1	6
412	134	thi1pyr14	0.02	1	6
413	134	thi1pyr14	0.02	1	6
414	134	thi1pyr14	0.02	0	6
415	134	thi1pyr14	0.02	0	6
416	134	thi1pyr14	0.02	0	6
417	134	thi1pyr14	0.02	0	6
418	134	control	0.02	1	2
419	134	control	0.02	1	4
420	134	control	0.02	1	4
421	134	control	0.02	1	5
422	134	control	0.02	1	6
423	134	control	0.02	1	6
424	134	control	0.02	1	6
425	134	control	0.02	1	6
426	134	control	0.02	1	6
427	134	control	0.02	1	6
428	134	control	0.02	0	6
429	134	control	0.02	0	6
430	135	control	0	0	6
431	135	control	0	0	6
432	135	control	0	0	6
433	135	control	0	0	6
434	135	control	0	0	6
435	135	control	0	0	6
436	135	control	0	0	6
437	135	control	0	0	6
438	135	control	0	0	6
439	135	control	0	0	6
440	135	control	0	0	6
441	135	control	0	0	6
442	135	thi1pyr14	0	0	6
443	135	thi1pyr14	0	0	6
444	135	thi1pyr14	0	0	6
445	135	thi1pyr14	0	0	6
446	135	thi1pyr14	0	0	6
447	135	thi1pyr14	0	0	6
448	135	thi1pyr14	0	0	6
449	135	thi1pyr14	0	0	6
450	135	thi1pyr14	0	0	6
451	135	thi1pyr14	0	0	6
452	135	thi1pyr14	0	0	6
453	135	thi1pyr14	0	0	6
454	135	thi1pyr14	0.01	1	2
455	135	thi1pyr14	0.01	1	4
456	135	thi1pyr14	0.01	1	4
457	135	thi1pyr14	0.01	1	5
458	135	thi1pyr14	0.01	1	5
459	135	thi1pyr14	0.01	1	6
460	135	thi1pyr14	0.01	1	6
461	135	thi1pyr14	0.01	1	6
462	135	thi1pyr14	0.01	1	6
463	135	thi1pyr14	0.01	0	6
464	135	thi1pyr14	0.01	0	6
465	135	thi1pyr14	0.01	0	6
466	135	pyr14	0.01	1	2
467	135	pyr14	0.01	1	3
468	135	pyr14	0.01	1	4
469	135	pyr14	0.01	1	4
470	135	pyr14	0.01	1	5
471	135	pyr14	0.01	1	5
472	135	pyr14	0.01	1	5
473	135	pyr14	0.01	1	5
474	135	pyr14	0.01	1	6
475	135	pyr14	0.01	1	6
476	135	pyr14	0.01	1	6
477	135	pyr14	0.01	0	6
478	136	control	0	1	1
479	136	control	0	0	6
480	136	control	0	0	6
481	136	control	0	0	6
482	136	control	0	0	6
483	136	control	0	0	6
484	136	control	0	0	6
485	136	control	0	0	6
486	136	control	0	0	6
487	136	control	0	0	6
488	136	control	0	0	6
489	136	control	0	0	6
490	136	thi1pyr14	0.001	1	2
491	136	thi1pyr14	0.001	1	5
492	136	thi1pyr14	0.001	1	6
493	136	thi1pyr14	0.001	0	6
494	136	thi1pyr14	0.001	0	6
495	136	thi1pyr14	0.001	0	6
496	136	thi1pyr14	0.001	0	6
497	136	thi1pyr14	0.001	0	6
498	136	thi1pyr14	0.001	0	6
499	136	thi1pyr14	0.001	0	6
500	136	thi1pyr14	0.001	0	6
501	136	thi1pyr14	0.001	0	6
502	136	thi1pyr14	0.001	1	2
503	136	thi1pyr14	0.001	1	5
504	136	thi1pyr14	0.001	1	5
505	136	thi1pyr14	0.001	1	6
506	136	thi1pyr14	0.001	0	6
507	136	thi1pyr14	0.001	0	6
508	136	thi1pyr14	0.001	0	6
509	136	thi1pyr14	0.001	0	6
510	136	thi1pyr14	0.001	0	6
511	136	thi1pyr14	0.001	0	6
512	136	thi1pyr14	0.001	0	6
513	136	thi1pyr14	0.001	0	6
514	136	control	0.001	1	1
515	136	control	0.001	1	4
516	136	control	0.001	1	6
517	136	control	0.001	0	6
518	136	control	0.001	0	6
519	136	control	0.001	0	6
520	136	control	0.001	0	6
521	136	control	0.001	0	6
522	136	control	0.001	0	6
523	136	control	0.001	0	6
524	136	control	0.001	0	6
525	136	control	0.001	0	6
526	137	control	0	0	6
527	137	control	0	0	6
528	137	control	0	0	6
529	137	control	0	0	6
530	137	control	0	0	6
531	137	control	0	0	6
532	137	control	0	0	6
533	137	control	0	0	6
534	137	control	0	0	6
535	137	control	0	0	6
536	137	control	0	0	6
537	137	control	0	0	6
538	137	thi1pyr14	0.01	1	1
539	137	thi1pyr14	0.01	1	1
540	137	thi1pyr14	0.01	1	4
541	137	thi1pyr14	0.01	1	5
542	137	thi1pyr14	0.01	1	5
543	137	thi1pyr14	0.01	1	6
544	137	thi1pyr14	0.01	1	6
545	137	thi1pyr14	0.01	1	6
546	137	thi1pyr14	0.01	1	6
547	137	thi1pyr14	0.01	1	6
548	137	thi1pyr14	0.01	1	6
549	137	thi1pyr14	0.01	0	6
550	137	thi1pyr14	0.01	1	1
551	137	thi1pyr14	0.01	1	4
552	137	thi1pyr14	0.01	1	4
553	137	thi1pyr14	0.01	1	4
554	137	thi1pyr14	0.01	1	5
555	137	thi1pyr14	0.01	1	6
556	137	thi1pyr14	0.01	1	6
557	137	thi1pyr14	0.01	1	6
558	137	thi1pyr14	0.01	1	6
559	137	thi1pyr14	0.01	0	6
560	137	thi1pyr14	0.01	0	6
561	137	thi1pyr14	0.01	0	6
562	137	control	0.01	1	5
563	137	control	0.01	1	5
564	137	control	0.01	1	5
565	137	control	0.01	1	5
566	137	control	0.01	1	5
567	137	control	0.01	1	6
568	137	control	0.01	1	6
569	137	control	0.01	1	6
570	137	control	0.01	0	6
571	137	control	0.01	0	6
572	137	control	0.01	0	6
573	137	control	0.01	0	6
574	138	control	0	1	1
575	138	control	0	0	6
576	138	control	0	0	6
577	138	control	0	0	6
578	138	control	0	0	6
579	138	control	0	0	6
580	138	control	0	0	6
581	138	control	0	0	6
582	138	control	0	0	6
583	138	control	0	0	6
584	138	control	0	0	6
585	138	control	0	0	6
586	138	thi1pyr14	0.02	1	1
587	138	thi1pyr14	0.02	1	4
588	138	thi1pyr14	0.02	1	4
589	138	thi1pyr14	0.02	1	5
590	138	thi1pyr14	0.02	1	6
591	138	thi1pyr14	0.02	1	6
592	138	thi1pyr14	0.02	1	6
593	138	thi1pyr14	0.02	1	6
594	138	thi1pyr14	0.02	0	6
595	138	thi1pyr14	0.02	0	6
596	138	thi1pyr14	0.02	0	6
597	138	thi1pyr14	0.02	0	6
598	138	thi1pyr14	0.02	1	2
599	138	thi1pyr14	0.02	1	4
600	138	thi1pyr14	0.02	1	4
601	138	thi1pyr14	0.02	1	4
602	138	thi1pyr14	0.02	1	5
603	138	thi1pyr14	0.02	1	5
604	138	thi1pyr14	0.02	1	5
605	138	thi1pyr14	0.02	0	6
606	138	thi1pyr14	0.02	0	6
607	138	thi1pyr14	0.02	0	6
608	138	thi1pyr14	0.02	0	6
609	138	thi1pyr14	0.02	0	6
610	138	control	0.02	1	5
611	138	control	0.02	1	5
612	138	control	0.02	1	5
613	138	control	0.02	1	6
614	138	control	0.02	1	6
615	138	control	0.02	1	6
616	138	control	0.02	1	6
617	138	control	0.02	1	6
618	138	control	0.02	1	6
619	138	control	0.02	0	6
620	138	control	0.02	0	6
621	138	control	0.02	0	6
622	139	control	0	1	2
623	139	control	0	0	6
624	139	control	0	0	6
625	139	control	0	0	6
626	139	control	0	0	6
627	139	control	0	0	6
628	139	control	0	0	6
629	139	control	0	0	6
630	139	control	0	0	6
631	139	control	0	0	6
632	139	control	0	0	6
633	139	control	0	0	6
634	139	thi1pyr14	0.001	1	5
635	139	thi1pyr14	0.001	1	6
636	139	thi1pyr14	0.001	1	6
637	139	thi1pyr14	0.001	0	6
638	139	thi1pyr14	0.001	0	6
639	139	thi1pyr14	0.001	0	6
640	139	thi1pyr14	0.001	0	6
641	139	thi1pyr14	0.001	0	6
642	139	thi1pyr14	0.001	0	6
643	139	thi1pyr14	0.001	0	6
644	139	thi1pyr14	0.001	0	6
645	139	thi1pyr14	0.02	1	3
646	139	thi1pyr14	0.02	1	3
647	139	thi1pyr14	0.02	1	4
648	139	thi1pyr14	0.02	1	4
649	139	thi1pyr14	0.02	1	4
650	139	thi1pyr14	0.02	1	5
651	139	thi1pyr14	0.02	1	5
652	139	thi1pyr14	0.02	1	5
653	139	thi1pyr14	0.02	1	6
654	139	thi1pyr14	0.02	1	6
655	139	thi1pyr14	0.02	1	6
656	139	thi1pyr14	0.02	0	6
657	139	control	0.001	1	4
658	139	control	0.001	1	4
659	139	control	0.001	1	5
660	139	control	0.001	1	6
661	139	control	0.001	1	6
662	139	control	0.001	1	6
663	139	control	0.001	0	6
664	139	control	0.001	0	6
665	139	control	0.001	0	6
666	139	control	0.001	0	6
667	139	control	0.001	0	6
668	139	control	0.001	0	6
669	153	control	0	1	2
670	153	control	0	0	6
671	153	control	0	0	6
672	153	control	0	0	6
673	153	control	0	0	6
674	153	control	0	0	6
675	153	control	0	0	6
676	153	control	0	0	6
677	153	control	0	0	6
678	153	control	0	0	6
679	153	control	0	0	6
680	153	control	0	0	6
681	153	thi1pyr14	0	1	3
682	153	thi1pyr14	0	0	6
683	153	thi1pyr14	0	0	6
684	153	thi1pyr14	0	0	6
685	153	thi1pyr14	0	0	6
686	153	thi1pyr14	0	0	6
687	153	thi1pyr14	0	0	6
688	153	thi1pyr14	0	0	6
689	153	thi1pyr14	0	0	6
690	153	thi1pyr14	0	0	6
691	153	thi1pyr14	0	0	6
692	153	thi1pyr14	0	0	6
693	151	control	0	0	6
694	151	control	0	0	6
695	151	control	0	0	6
696	151	control	0	0	6
697	151	control	0	0	6
698	151	control	0	0	6
699	151	control	0	0	6
700	151	control	0	0	6
701	151	control	0	0	6
702	151	control	0	0	6
703	151	control	0	0	6
704	151	control	0	0	6
705	151	thi1pyr14	0.001	1	4
706	151	thi1pyr14	0.001	1	4
707	151	thi1pyr14	0.001	1	4
708	151	thi1pyr14	0.001	1	4
709	151	thi1pyr14	0.001	1	5
710	151	thi1pyr14	0.001	1	5
711	151	thi1pyr14	0.001	0	6
712	151	thi1pyr14	0.001	0	6
713	151	thi1pyr14	0.001	0	6
714	151	thi1pyr14	0.001	0	6
715	151	thi1pyr14	0.001	0	6
716	151	thi1pyr14	0.001	0	6
717	151	thi1pyr14	0.001	1	4
718	151	thi1pyr14	0.001	1	4
719	151	thi1pyr14	0.001	1	4
720	151	thi1pyr14	0.001	1	5
721	151	thi1pyr14	0.001	1	5
722	151	thi1pyr14	0.001	1	6
723	151	thi1pyr14	0.001	1	6
724	151	thi1pyr14	0.001	0	6
725	151	thi1pyr14	0.001	0	6
726	151	thi1pyr14	0.001	0	6
727	151	thi1pyr14	0.001	0	6
728	151	thi1pyr14	0.001	0	6
729	151	control	0.001	1	4
730	151	control	0.001	1	4
731	151	control	0.001	1	5
732	151	control	0.001	1	5
733	151	control	0.001	1	5
734	151	control	0.001	1	5
735	151	control	0.001	1	6
736	151	control	0.001	1	6
737	151	control	0.001	0	6
738	151	control	0.001	0	6
739	151	control	0.001	0	6
740	151	control	0.001	0	6

## Sheet: POS_CTL
id	plate	tx	survive	censor
1	58	control	3	1
2	58	control	5	1
3	58	control	5	1
4	58	control	7	0
5	58	control	7	0
6	58	control	7	0
7	58	control	7	0
8	58	control	7	0
9	58	control	7	0
10	58	control	7	0
11	58	control	7	0
12	58	control	7	0
13	58	thi10bos80	4	1
14	58	thi10bos80	4	1
15	58	thi10bos80	4	1
16	58	thi10bos80	4	1
17	58	thi10bos80	5	1
18	58	thi10bos80	5	1
19	58	thi10bos80	5	1
20	58	thi10bos80	6	1
21	58	thi10bos80	6	1
22	58	thi10bos80	7	1
23	58	thi10bos80	7	0
24	58	thi10bos80	7	0
25	59	control	6	1
26	59	control	7	0
27	59	control	7	0
28	59	control	7	0
29	59	control	7	0
30	59	control	7	0
31	59	control	7	0
32	59	control	7	0
33	59	control	7	0
34	59	control	7	0
35	59	control	7	0
36	59	control	7	0
37	59	thi10bos80	3	1
38	59	thi10bos80	4	1
39	59	thi10bos80	4	1
40	59	thi10bos80	4	1
41	59	thi10bos80	5	1
42	59	thi10bos80	5	1
43	59	thi10bos80	5	1
44	59	thi10bos80	6	1
45	59	thi10bos80	7	1
46	59	thi10bos80	7	0
47	59	thi10bos80	7	0
48	59	thi10bos80	7	0
49	61	control	3	1
50	61	control	4	1
51	61	control	5	1
52	61	control	7	0
53	61	control	7	0
54	61	control	7	0
55	61	control	7	0
56	61	control	7	0
57	61	control	7	0
58	61	control	7	0
59	61	control	7	0
60	61	control	7	0
61	61	thi10bos80	3	1
62	61	thi10bos80	3	1
63	61	thi10bos80	3	1
64	61	thi10bos80	4	1
65	61	thi10bos80	4	1
66	61	thi10bos80	5	1
67	61	thi10bos80	5	1
68	61	thi10bos80	6	1
69	61	thi10bos80	7	0
70	61	thi10bos80	7	0
71	61	thi10bos80	7	0
72	61	thi10bos80	7	0
73	62	control	2	1
74	62	control	7	0
75	62	control	7	0
76	62	control	7	0
77	62	control	7	0
78	62	control	7	0
79	62	control	7	0
80	62	control	7	0
81	62	control	7	0
82	62	control	7	0
83	62	control	7	0
84	62	control	7	0
85	62	thi10bos80	3	1
86	62	thi10bos80	4	1
87	62	thi10bos80	4	1
88	62	thi10bos80	4	1
89	62	thi10bos80	7	1
90	62	thi10bos80	7	1
91	62	thi10bos80	7	1
92	62	thi10bos80	7	0
93	62	thi10bos80	7	0
94	62	thi10bos80	7	0
95	62	thi10bos80	7	0
96	62	thi10bos80	7	0
97	64	control	3	1
98	64	control	7	0
99	64	control	7	0
100	64	control	7	0
101	64	control	7	0
102	64	control	7	0
103	64	control	7	0
104	64	control	7	0
105	64	control	7	0
106	64	control	7	0
107	64	control	7	0
108	64	control	7	0
109	64	thi10bos40	3	1
110	64	thi10bos40	5	1
111	64	thi10bos40	5	1
112	64	thi10bos40	7	1
113	64	thi10bos40	7	0
114	64	thi10bos40	7	0
115	64	thi10bos40	7	0
116	64	thi10bos40	7	0
117	64	thi10bos40	7	0
118	64	thi10bos40	7	0
119	64	thi10bos40	7	0
120	64	thi10bos40	7	0
121	65	control	3	1
122	65	control	7	0
123	65	control	7	0
124	65	control	7	0
125	65	control	7	0
126	65	control	7	0
127	65	control	7	0
128	65	control	7	0
129	65	control	7	0
130	65	control	7	0
131	65	control	7	0
132	65	control	7	0
133	65	thi10bos40	3	1
134	65	thi10bos40	6	1
135	65	thi10bos40	7	1
136	65	thi10bos40	7	0
137	65	thi10bos40	7	0
138	65	thi10bos40	7	0
139	65	thi10bos40	7	0
140	65	thi10bos40	7	0
141	65	thi10bos40	7	0
142	65	thi10bos40	7	0
143	65	thi10bos40	7	0
144	65	thi10bos40	7	0
145	66	control	2	1
146	66	control	7	0
147	66	control	7	0
148	66	control	7	0
149	66	control	7	0
150	66	control	7	0
151	66	control	7	0
152	66	control	7	0
153	66	control	7	0
154	66	control	7	0
155	66	control	7	0
156	66	control	7	0
157	66	thi10bos40	2	1
158	66	thi10bos40	4	1
159	66	thi10bos40	4	1
160	66	thi10bos40	4	1
161	66	thi10bos40	6	1
162	66	thi10bos40	7	0
163	66	thi10bos40	7	0
164	66	thi10bos40	7	0
165	66	thi10bos40	7	0
166	66	thi10bos40	7	0
167	66	thi10bos40	7	0
168	66	thi10bos40	7	0
169	67	control	3	1
170	67	control	6	1
171	67	control	7	0
172	67	control	7	0
173	67	control	7	0
174	67	control	7	0
175	67	control	7	0
176	67	control	7	0
177	67	control	7	0
178	67	control	7	0
179	67	control	7	0
180	67	thi10bos40	3	1
181	67	thi10bos40	3	1
182	67	thi10bos40	4	1
183	67	thi10bos40	5	1
184	67	thi10bos40	6	1
185	67	thi10bos40	7	0
186	67	thi10bos40	7	0
187	67	thi10bos40	7	0
188	67	thi10bos40	7	0
189	67	thi10bos40	7	0
190	67	thi10bos40	7	0
191	67	thi10bos40	7	0

## Sheet: CFU
Date 2019	OD 600	dilution	colonies*	cfu/ml	0.5 ul of 1/100	0.5 ul of 1/200	0.5 ul of 1/1000
2020-06-17	0.89	1/10^5	47	7.83333e+07	391.667	195.833	39.1667
		1/10^6	8	1.33333e+08
2020-06-18	0.7	1/10^5	60	100000000	500	250	50
		1/10^6	10	1.66667e+08
2020-06-19	0.9	1/10^5	42	70000000	350	175	35
		1/10^6	5	8.33333e+07
2020-06-20	0.8	1/10^5	57	95000000	475	237.5	47.5
		1/10^6	2	3.33333e+07
2020-06-21	1.18	1/10^5	42	70000000	350	175	35
		1/10^6	8	1.33333e+08
2019-07-17	0.651	1/10^5	57	95000000	475	237.5	47.5
		1/10^6	9	150000000
2019-07-18	0.82	1/10^5	63	105000000	525	262.5	52.5
		1/10^6	4	6.66667e+07
2019-07-24	0.963	1/10^5	52	8.66667e+07	433.333	216.667	43.3333
		1/10^6	10	1.66667e+08
2019-07-25	0.625	1/10^5	40	6.66667e+07	333.333	166.667	33.3333
		1/10^6	2	3.33333e+07
2019-07-26	1.007	1/10^5	64	1.06667e+08	533.333	266.667	53.3333
		1/10^6	6	100000000
2019-07-29	0.825	1/10^5	48	80000000	400	200	40
		1/10^6	6	100000000
2019-07-30	0.442	1/10^5	37	6.16667e+07	308.333	154.167	30.8333
		1/10^6	5	8.33333e+07
2019-07-31	0.681	1/10^5	31	5.16667e+07	258.333	129.167	25.8333
		1/10^6	3	50000000
2019-08-01	1.1	1/10^5	79	1.31667e+08	658.333	329.167	65.8333
		1/10^6	12	200000000
2019-08-02	1.181	1/10^5	65	1.08333e+08	541.667	270.833	54.1667
		1/10^6	8	1.33333e+08
2019-08-03	1.065	1/10^5	81	135000000	675	337.5	67.5
		1/10^6	15	250000000
2019-08-07	1.033	1/10^5	100	1.66667e+08	833.333	416.667	83.3333
		1/10^6	13	2.16667e+08
2019-08-08	0.602	1/10^5	55	9.16667e+07	458.333	229.167	45.8333
		1/10^6	9	150000000
2019-08-09	0.676	1/10^5	52	8.66667e+07	433.333	216.667	43.3333
		1/10^6	10	1.66667e+08
2019-08-13	0.846	1/10^5	78	130000000	650	325	65
		1/10^6	3	50000000
			*colonies were counted in 3x 20 ul = 60 ul of each dilution
average	0.84935				479.167	239.583	47.9167
SD	0.205933				142.464	71.2321	14.2464
